# Supplementary material
Source: publisher site journal article supplement (https://www.dovepress.com/get_supplementary_file.php?f=272109.docx)
Supplement: Supplementary file 1 [file get_supplementary_file.php]

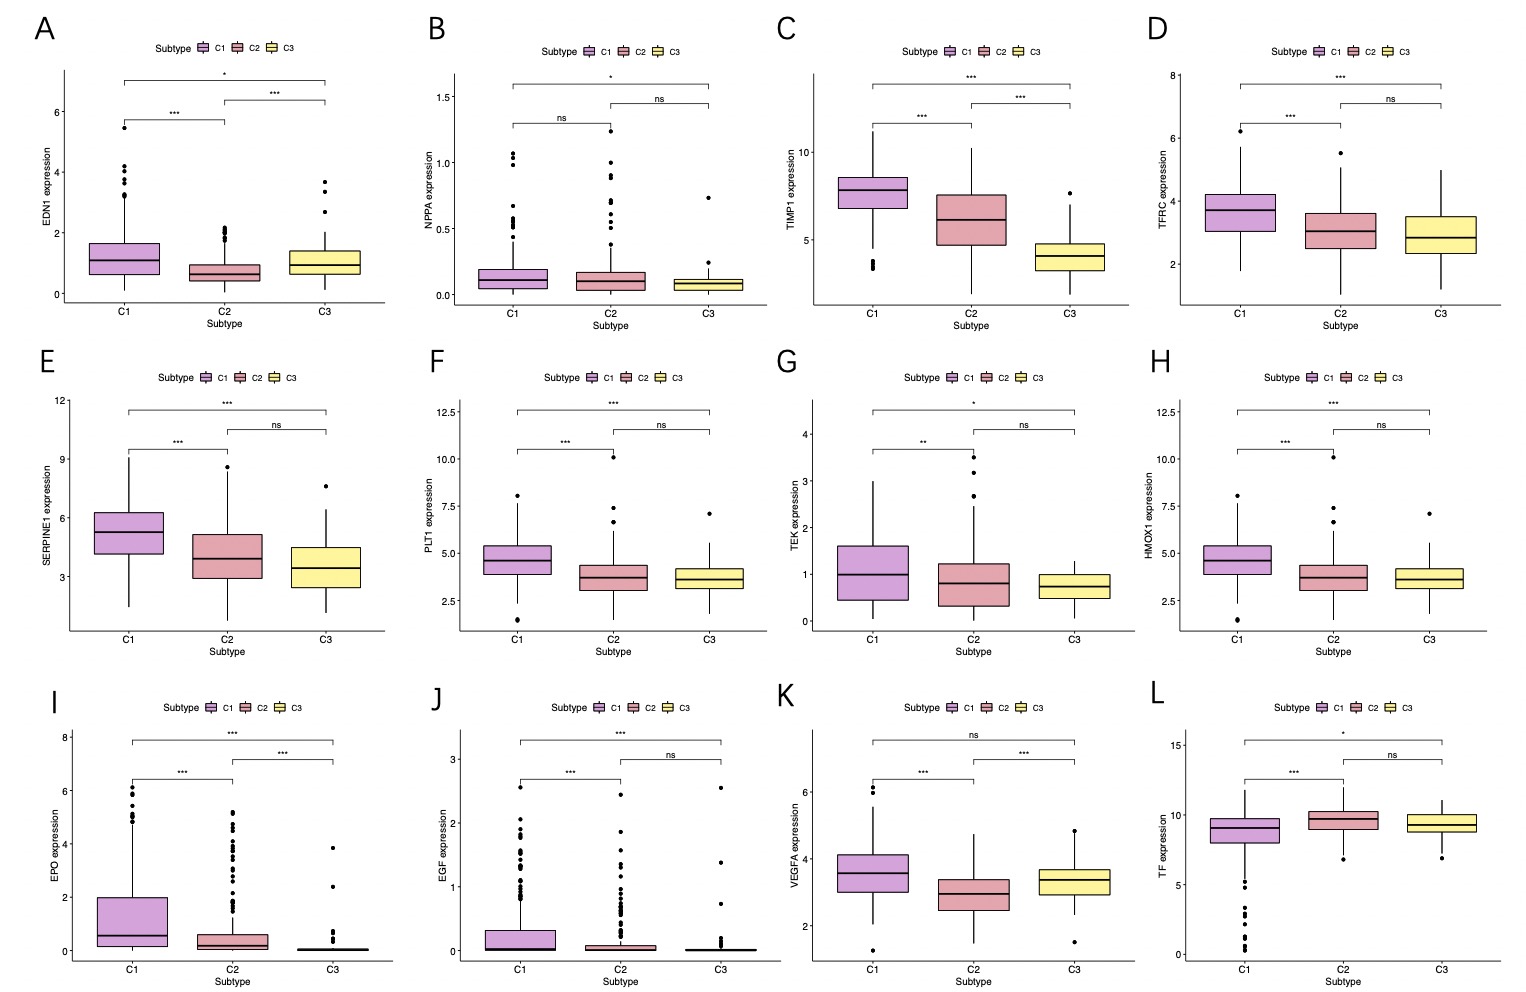


Supplementary Figure 1. Expression changes (hypoxia-high vs. hypoxia-low) of target genes of increased oxygen delivery involved in HIF-1 KEGG pathway. (A)-(J) show genes that are highly expressed in Cluster 1 compared to Cluster 3, (K) and (J) show genes not highly expressed in Cluster 1 compared Cluster 3.


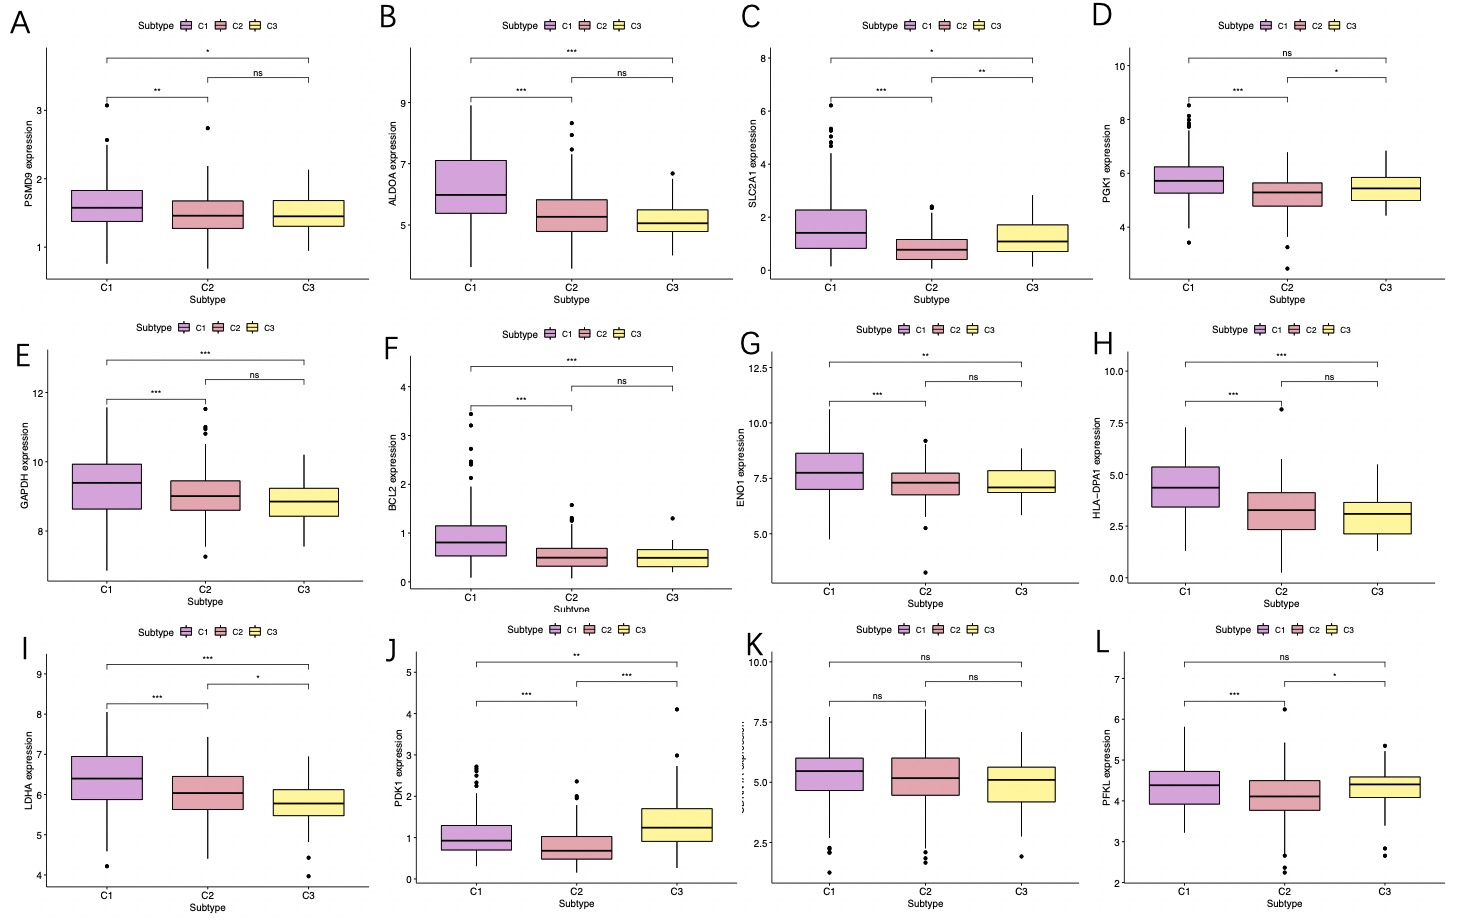


Supplementary Figure 2. Expression changes (hypoxia-high vs. hypoxia-low) of target genes of reduce oxygen consumption involved in HIF-1 KEGG pathway. (A)-(I) show genes that are highly expressed in Cluster 1 compared to Cluster 3, (J) and (L) show genes not highly expressed in Cluster 1 compared Cluster 3.


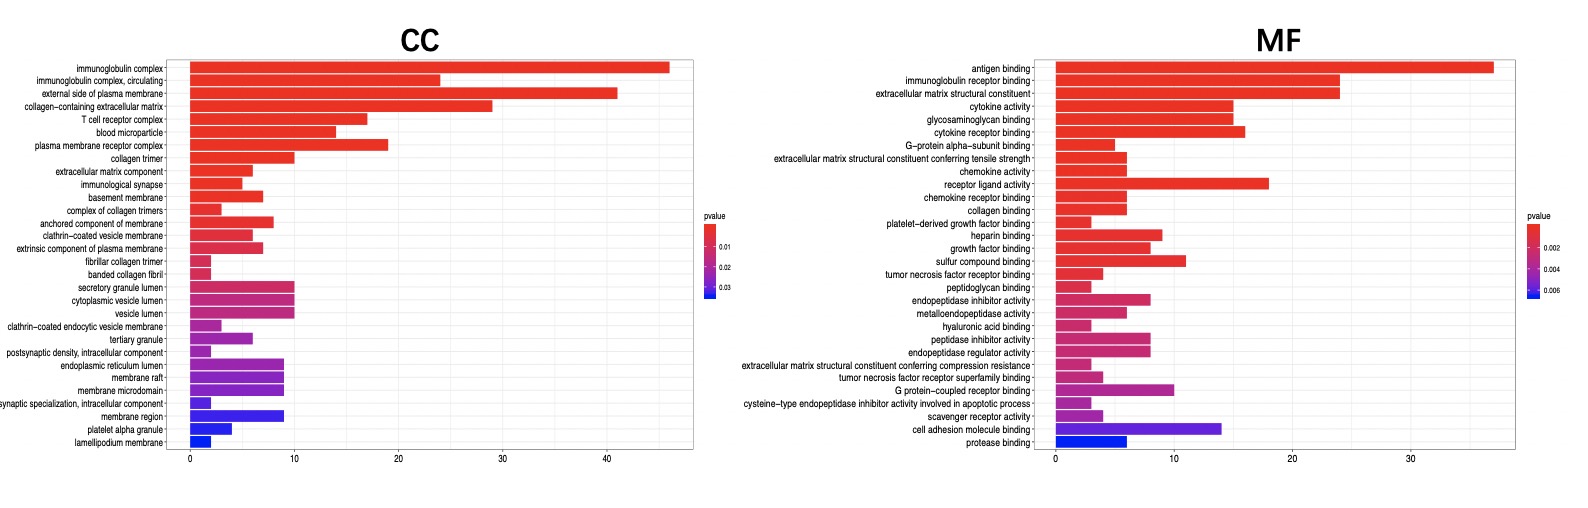


Supplementary Figure 3. Significantly enriched (A) Cellular component GO terms and (B) molecular function GO terms.


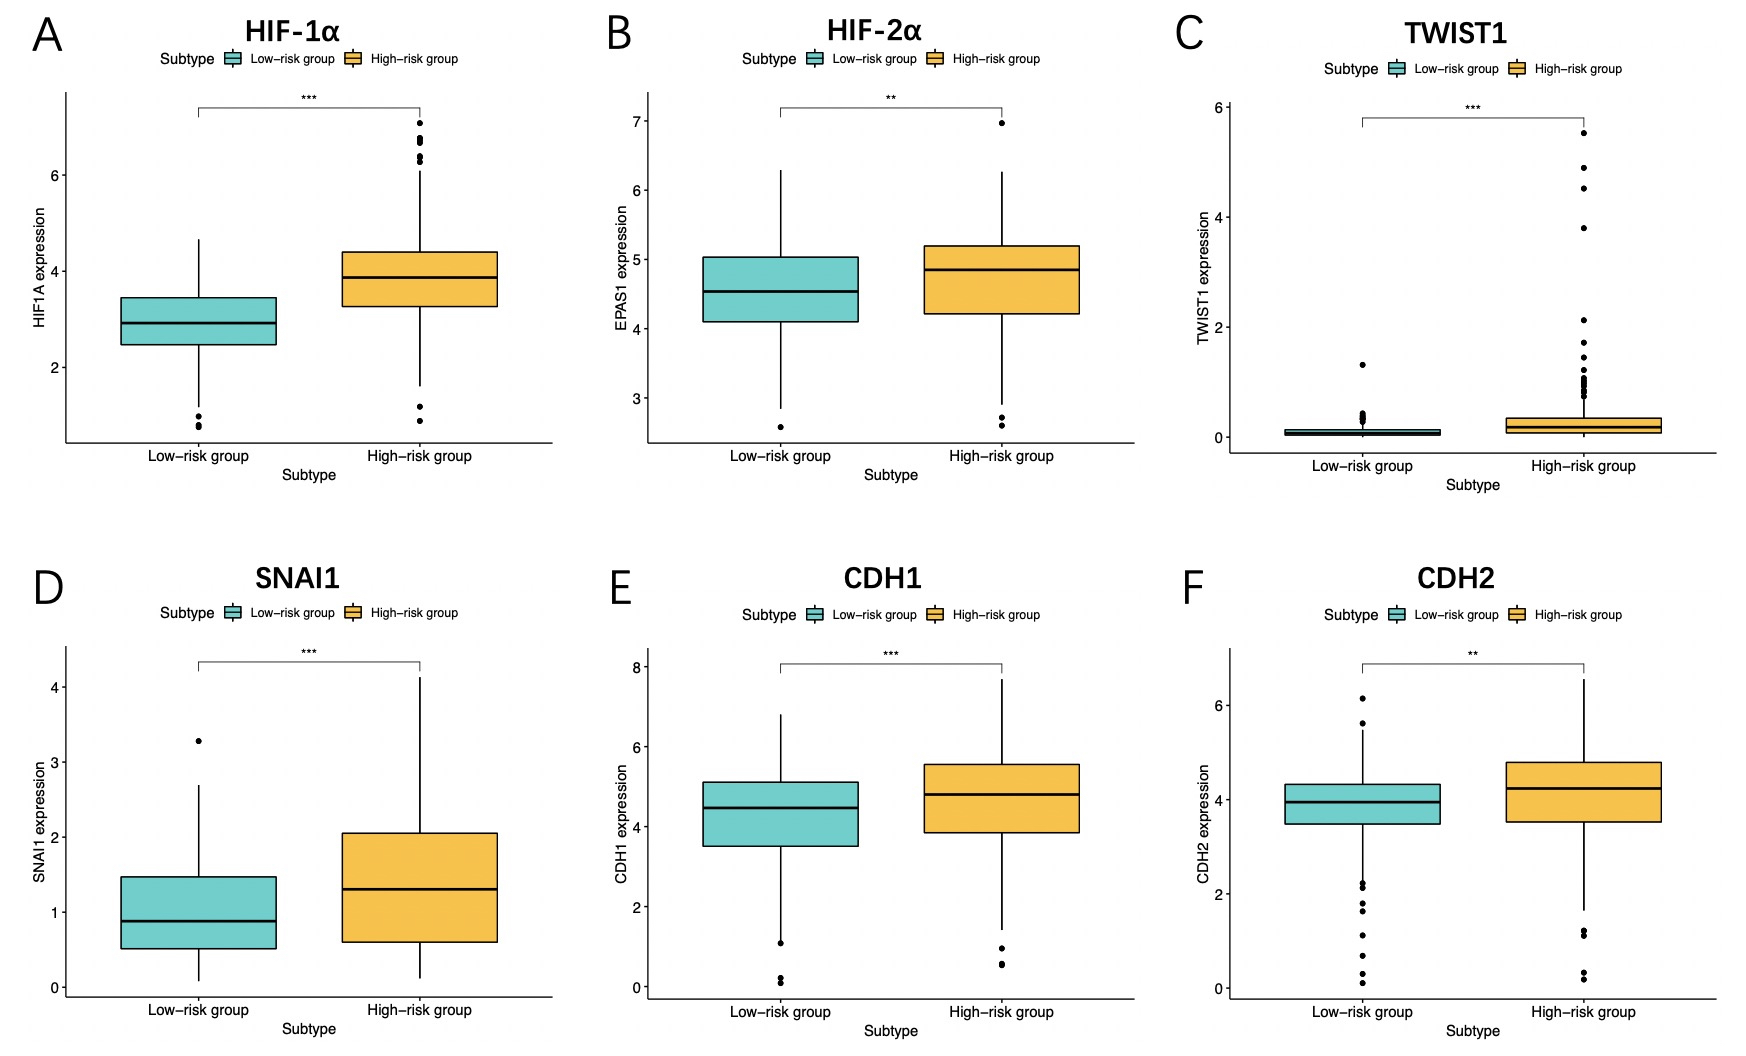


Supplementary Figure 4.Scatter plots visualizing signiﬁcantly different expression of (A) hypoxia-inducible factor-1α (*HIF-1α*), (B) *HIF-2α*, (C) snail family transcriptional repressor 1 (*SNAI1*), (D) Twist family BHLH transcription factor 1 (*TWIST-1*), (E) *CDH1* (E-cadherin), and (F) *CDH2* (N-cadherin). between high-risk and low-risk cases.

Supplementary Table 1. General characteristics of the Gene Oncology terms of Biological Process differently enriched by marker genes in hypoxia-high group with regard to TCGA

| **ID** | **Description** | **GeneRatio** | **p-Value** | **p-adjust** | **q-value** | **Count** |
| --- | --- | --- | --- | --- | --- | --- |
| GO:0006007 | glucose catabolic process | 8/74 | 1.14E-12 | 1.90E-09 | 1.42E-09 | 8 |
| GO:0046031 | ADP metabolic process | 11/74 | 2.48E-12 | 1.90E-09 | 1.42E-09 | 11 |
| GO:0009135 | purine nucleoside diphosphate metabolic process | 11/74 | 6.75E-12 | 1.90E-09 | 1.42E-09 | 11 |
| GO:0009179 | purine ribonucleoside diphosphate metabolic process | 11/74 | 6.75E-12 | 1.90E-09 | 1.42E-09 | 11 |
| GO:0005996 | monosaccharide metabolic process | 14/74 | 7.55E-12 | 1.90E-09 | 1.42E-09 | 14 |
| GO:0009185 | ribonucleoside diphosphate metabolic process | 11/74 | 7.91E-12 | 1.90E-09 | 1.42E-09 | 11 |
| GO:0001666 | response to hypoxia | 15/74 | 8.86E-12 | 1.90E-09 | 1.42E-09 | 15 |
| GO:0006735 | NADH regeneration | 7/74 | 9.58E-12 | 1.90E-09 | 1.42E-09 | 7 |
| GO:0061621 | canonical glycolysis | 7/74 | 9.58E-12 | 1.90E-09 | 1.42E-09 | 7 |
| GO:0061718 | glucose catabolic process to pyruvate | 7/74 | 9.58E-12 | 1.90E-09 | 1.42E-09 | 7 |
| GO:0061615 | glycolytic process through fructose-6-phosphate | 7/74 | 1.27E-11 | 2.08E-09 | 1.55E-09 | 7 |
| GO:0061620 | glycolytic process through glucose-6-phosphate | 7/74 | 1.27E-11 | 2.08E-09 | 1.55E-09 | 7 |
| GO:0036293 | response to decreased oxygen levels | 15/74 | 1.36E-11 | 2.08E-09 | 1.55E-09 | 15 |
| GO:0006024 | glycosaminoglycan biosynthetic process | 10/74 | 1.74E-11 | 2.48E-09 | 1.84E-09 | 10 |
| GO:0006090 | pyruvate metabolic process | 11/74 | 2.24E-11 | 2.97E-09 | 2.21E-09 | 11 |
| GO:0006023 | aminoglycan biosynthetic process | 10/74 | 2.73E-11 | 3.11E-09 | 2.31E-09 | 10 |
| GO:0006096 | glycolytic process | 10/74 | 2.73E-11 | 3.11E-09 | 2.31E-09 | 10 |
| GO:0009132 | nucleoside diphosphate metabolic process | 11/74 | 2.97E-11 | 3.11E-09 | 2.31E-09 | 11 |
| GO:0006757 | ATP generation from ADP | 10/74 | 2.97E-11 | 3.11E-09 | 2.31E-09 | 10 |
| GO:0070482 | response to oxygen levels | 15/74 | 3.31E-11 | 3.29E-09 | 2.44E-09 | 15 |
| GO:0042866 | pyruvate biosynthetic process | 10/74 | 3.84E-11 | 3.64E-09 | 2.71E-09 | 10 |
| GO:0019320 | hexose catabolic process | 8/74 | 5.84E-11 | 5.28E-09 | 3.92E-09 | 8 |
| GO:0006165 | nucleoside diphosphate phosphorylation | 10/74 | 1.26E-10 | 1.07E-08 | 7.97E-09 | 10 |
| GO:0009166 | nucleotide catabolic process | 11/74 | 1.37E-10 | 1.07E-08 | 7.97E-09 | 11 |
| GO:0009127 | purine nucleoside monophosphate biosynthetic process | 11/74 | 1.45E-10 | 1.07E-08 | 7.97E-09 | 11 |
| GO:0009168 | purine ribonucleoside monophosphate biosynthetic process | 11/74 | 1.45E-10 | 1.07E-08 | 7.97E-09 | 11 |
| GO:0046939 | nucleotide phosphorylation | 10/74 | 1.46E-10 | 1.07E-08 | 7.97E-09 | 10 |
| GO:0006734 | NADH metabolic process | 7/74 | 1.93E-10 | 1.33E-08 | 9.88E-09 | 7 |
| GO:1901292 | nucleoside phosphate catabolic process | 11/74 | 1.94E-10 | 1.33E-08 | 9.88E-09 | 11 |
| GO:0046365 | monosaccharide catabolic process | 8/74 | 2.23E-10 | 1.48E-08 | 1.10E-08 | 8 |

| GO, gene oncology; TCGA, The Cancer Genome Atlas.  Supplementary Table 2. General characteristics of the Gene Oncology terms of Biological Process differently enriched by marker genes in hypoxia-low group with regard to TCGA   | **ID** | **Description** | **GeneRatio** | **p-Value** | **p-adjust** | **q-value** | **Count** | | --- | --- | --- | --- | --- | --- | --- | | GO:0006027 | glycosaminoglycan catabolic process | 5/35 | 9.48E-08 | 4.85E-05 | 3.45E-05 | 5 | | GO:0006006 | glucose metabolic process | 7/35 | 1.03E-07 | 4.85E-05 | 3.45E-05 | 7 | | GO:0006026 | aminoglycan catabolic process | 5/35 | 1.31E-07 | 4.85E-05 | 3.45E-05 | 5 | | GO:0019318 | hexose metabolic process | 7/35 | 3.37E-07 | 9.38E-05 | 6.67E-05 | 7 | | GO:0030203 | glycosaminoglycan metabolic process | 6/35 | 4.77E-07 | 0.00010599 | 7.53E-05 | 6 | | GO:0006022 | aminoglycan metabolic process | 6/35 | 6.80E-07 | 0.00012609 | 8.96E-05 | 6 | | GO:0005996 | monosaccharide metabolic process | 7/35 | 9.84E-07 | 0.00015637 | 0.00011117 | 7 | | GO:0006024 | glycosaminoglycan biosynthetic process | 5/35 | 1.83E-06 | 0.00025303 | 0.00017988 | 5 | | GO:0030207 | chondroitin sulfate catabolic process | 3/35 | 2.17E-06 | 0.00025303 | 0.00017988 | 3 | | GO:0006023 | aminoglycan biosynthetic process | 5/35 | 2.28E-06 | 0.00025303 | 0.00017988 | 5 | | GO:0005977 | glycogen metabolic process | 4/35 | 1.08E-05 | 0.00096464 | 0.00068577 | 4 | | GO:0006073 | cellular glucan metabolic process | 4/35 | 1.14E-05 | 0.00096464 | 0.00068577 | 4 | | GO:0044042 | glucan metabolic process | 4/35 | 1.14E-05 | 0.00096464 | 0.00068577 | 4 | | GO:0009152 | purine ribonucleotide biosynthetic process | 6/35 | 1.21E-05 | 0.00096464 | 0.00068577 | 6 | | GO:0044262 | cellular carbohydrate metabolic process | 6/35 | 1.37E-05 | 0.00101545 | 0.00072189 | 6 | | GO:0009260 | ribonucleotide biosynthetic process | 6/35 | 1.57E-05 | 0.00109173 | 0.00077612 | 6 | | GO:0006164 | purine nucleotide biosynthetic process | 6/35 | 1.80E-05 | 0.00110902 | 0.00078841 | 6 | | GO:0046390 | ribose phosphate biosynthetic process | 6/35 | 1.80E-05 | 0.00110902 | 0.00078841 | 6 | | GO:0006112 | energy reserve metabolic process | 4/35 | 2.06E-05 | 0.00120706 | 0.0008581 | 4 | | GO:0072522 | purine-containing compound biosynthetic process | 6/35 | 2.28E-05 | 0.00126785 | 0.00090132 | 6 | | GO:1901136 | carbohydrate derivative catabolic process | 5/35 | 2.76E-05 | 0.00146076 | 0.00103846 | 5 | | GO:0044264 | cellular polysaccharide metabolic process | 4/35 | 4.01E-05 | 0.00202709 | 0.00144107 | 4 | | GO:0016051 | carbohydrate biosynthetic process | 5/35 | 4.63E-05 | 0.00223961 | 0.00159215 | 5 | | GO:0030204 | chondroitin sulfate metabolic process | 3/35 | 5.27E-05 | 0.00244001 | 0.00173461 | 3 | | GO:1903510 | mucopolysaccharide metabolic process | 4/35 | 5.57E-05 | 0.00247609 | 0.00176027 | 4 | | GO:0005976 | polysaccharide metabolic process | 4/35 | 5.97E-05 | 0.0025512 | 0.00181366 | 4 | | GO:0009165 | nucleotide biosynthetic process | 6/35 | 7.34E-05 | 0.00297949 | 0.00211813 | 6 | | GO:0050654 | chondroitin sulfate proteoglycan metabolic process | 3/35 | 7.58E-05 | 0.00297949 | 0.00211813 | 3 | | GO:1901293 | nucleoside phosphate biosynthetic process | 6/35 | 7.77E-05 | 0.00297949 | 0.00211813 | 6 | | GO:0005978 | glycogen biosynthetic process | 3/35 | 8.67E-05 | 0.00306008 | 0.00217542 | 3 |   GO, gene oncology; TCGA, The Cancer Genome Atlas.  Supplementary Table 3. 29 Immune signatures (gene sets) | | | | | | | | | | | | | | | | | | | | | | | | | | | | | | | | | | | | | | | | | | | | | | | | | | | | | | | | |
| --- | --- | --- | --- | --- | --- | --- | --- | --- | --- | --- | --- | --- | --- | --- | --- | --- | --- | --- | --- | --- | --- | --- | --- | --- | --- | --- | --- | --- | --- | --- | --- | --- | --- | --- | --- | --- | --- | --- | --- | --- | --- | --- | --- | --- | --- | --- | --- | --- | --- | --- | --- | --- | --- | --- | --- | --- | --- | --- | --- | --- | --- | --- | --- | --- | --- | --- | --- | --- | --- | --- | --- | --- | --- | --- | --- | --- | --- | --- | --- | --- | --- | --- | --- | --- | --- | --- | --- | --- | --- | --- | --- | --- | --- | --- | --- | --- | --- | --- | --- | --- | --- | --- | --- | --- | --- | --- | --- | --- | --- | --- | --- | --- | --- | --- | --- | --- | --- | --- | --- | --- | --- | --- | --- | --- | --- | --- | --- | --- | --- | --- | --- | --- | --- | --- | --- | --- | --- | --- | --- | --- | --- | --- | --- | --- | --- | --- | --- | --- | --- | --- | --- | --- | --- | --- | --- | --- | --- | --- | --- | --- | --- | --- | --- | --- | --- | --- | --- | --- | --- | --- | --- | --- | --- | --- | --- | --- | --- | --- | --- | --- | --- | --- | --- | --- | --- | --- | --- | --- | --- | --- | --- | --- | --- | --- | --- | --- | --- | --- | --- | --- | --- | --- | --- | --- | --- | --- | --- | --- | --- | --- | --- | --- | --- | --- | --- | --- | --- | --- | --- | --- | --- | --- | --- | --- | --- | --- | --- | --- | --- | --- | --- | --- | --- | --- | --- | --- | --- | --- | --- | --- | --- | --- | --- | --- | --- | --- | --- | --- | --- | --- | --- | --- | --- | --- | --- | --- | --- | --- | --- | --- | --- | --- | --- | --- | --- | --- | --- | --- | --- | --- | --- | --- | --- |
| **aDCs** | **APC co inhibition** | | **APC co stimulation** | **B cells** | **CCR** | **CD8+ T cells** | **Check-point** | **Cytolytic activity** | **DCs** | **HLA** | **iDCs** | **Inflammation-promoting** | **Macrophages** | | **Mast cells** | **MHC class I** | | **Neutrophils** | | | **NK cells** | | | **Parainflammation** | | **pDCs** | | | | **T cell co-inhibition** | | **T cell co-stimulation** | | | **T helper cells** | | | **Tfh** | | | **Th1 cells** | | **Th2 cells** | | **TIL** | | | **Treg** | | | **Type I IFN Response** | | | **Type II IFN Response** | | |
| CD83 | | C10orf54 | | | | | | | | | | | | CD40 | | | BACH2 | | CCL16 | CD8A | | IDO1 | PRF1 | | CCL17 | | HLA-E | CD1A | CCL5 | | C11orf45 | | CMA1 | B2M | | EVI2B | KLRC1 | | CXCL10 | CLEC4C | | BTLA | | CD2 | | CD4 | PDCD1 | | IFNG | PMCH | | ITM2C | IL12RB2 | | DDX4 | GPR146 |
| LAMP3 | | CD274 | | | | | | | | | | | | CD58 | | | BANK1 | | TPO |  | | LAG3 | GZMA | | CCL22 | | HLA-DPB2 | CD1E | CD19 | | CD68 | | MS4A2 | HLA-A | | HSD17B11 | KLRF1 | | PLAT | CXCR3 | | C10orf54 | | CD226 | |  | CXCL13 | | TBX21 | LAIR2 | | CD38 | TMPRSS6 | | IFIT1 | SELP |
| CCL1 | | LGALS9 | | | | | | | | | | | | CD70 | | | BLK | | TGFBR2 |  | | CTLA4 |  | | CD209 | | HLA-C |  | CD8B | | CLEC5A | | TPSAB1 | TAP1 | | KDM6B |  | | CCND1 | GZMB | | CD160 | | CD27 | |  | CXCR5 | | CTLA4 | SMAD2 | | THEMIS2 | CTSC | | IFIT2 | AHR |
|  | | PDCD1LG2 | | | | | | | | | | | | ICOSLG | | | BTLA | | CXCL2 |  | | TNFRSF9 |  | | CCL13 | | HLA-J |  | CXCL10 | | CYBB | |  |  | | MEGF9 |  | | LGMN | IL3RA | | CD244 | | CD28 | |  |  | | STAT4 | CXCR6 | | GLYR1 | LAPTM4B | | IFIT3 |  |
|  | | PVRL3 | | | | | | | | | | | | SLAMF1 | | | CD79A | | CCL14 |  | | ICOS |  | |  | | HLA-DQB1 |  | CXCL13 | | FUCA1 | |  |  | | MNDA |  | | PLAUR | IRF7 | | CD274 | | CD40LG | |  |  | | CD38 | GATA3 | | ICOS | TFRC | | IRF7 |  |
|  | |  | | | | | | | | | | | | TNFSF14 | | | CD79B | | TGFBR3 |  | | CD80 |  | |  | | HLA-DQB2 |  | CXCL9 | | GPNMB | |  |  | | NLRP12 |  | | AIM2 | IRF8 | | CTLA4 | | ICOS | |  |  | | IL12RB2 | IL26 | | F5 | RNF145 | | ISG20 |  |
|  | |  | | | | | | | | | | | | TNFSF15 | | | FCRL1 | | IL11RA |  | | PDCD1LG2 |  | |  | | HLA-DQA2 |  | GNLY | | HS3ST2 | |  |  | | PADI4 |  | | MMP7 | LILRA4 | | HAVCR2 | | SLAMF1 | |  |  | | LTA |  | | TIGIT | NETO2 | | MX1 |  |
|  | |  | | | | | | | | | | | | TNFSF18 | | | FCRL3 | | CCL11 |  | | TIGIT |  | |  | | HLA-DQA1 |  | GZMB | | LGMN | |  |  | | SELL |  | | ICAM1 | PHEX | | LAG3 | | TNFRSF18 | |  |  | | CSF2 |  | | KLRD1 | ADAT2 | | MX2 |  |
|  | |  | | | | | | | | | | | | TNFSF4 | | | HVCN1 | | IL4I1 |  | | CD70 |  | |  | | HLA-A |  | IFNG | | MMP9 | |  |  | | TRANK1 |  | | MX2 | PLD4 | | LAIR1 | | TNFRSF25 | |  |  | |  |  | | IRF4 | CHST2 | | RSAD2 |  |
|  | |  | | | | | | | | | | | | TNFSF8 | | | RALGPS2 | | IL33 |  | | TNFSF9 |  | |  | | HLA-DMA |  | IL12A | | TM4SF19 | |  |  | | VNN3 |  | | CXCL9 | PTCRA | | TIGIT | | TNFRSF4 | |  |  | |  |  | | PRKCQ | CTLA4 | | TNFSF10 |  |
|  | |  | | | | | | | | | | | | TNFSF9 | | |  | | CXCL12 |  | | ICOSLG |  | |  | | HLA-DOB |  | IL12B | |  | |  |  | |  |  | | ANXA1 |  | |  | | TNFRSF8 | |  |  | |  |  | | FCRL5 | NFE2L3 | |  |  |
|  | |  | | | | | | | | | | | |  | | |  | | CXCL10 |  | | KIR3DL1 |  | |  | | HLA-DRB1 |  | IRF1 | |  | |  |  | |  |  | | TLR2 |  | |  | | TNFRSF9 | |  |  | |  |  | | SIRPG | LIMA1 | |  |  |
|  | |  | | | | | | | | | | | |  | | |  | | BMPER |  | | CD86 |  | |  | | HLA-H |  | PRF1 | |  | |  |  | |  |  | | PLA2G2D |  | |  | | TNFSF14 | |  |  | |  |  | | LPXN | IL1R2 | |  |  |
|  | |  | | | | | | | | | | | |  | | |  | | BMP8A |  | | PDCD1 |  | |  | | HLA-B |  | STAT1 | |  | |  |  | |  |  | | ITGA2 |  | |  | |  | |  |  | |  |  | | IL2RG | ICOS | |  |  |
|  | |  | | | | | | | | | | | |  | | |  | | CXCL11 |  | | LAIR1 |  | |  | | HLA-DRB5 |  | TBX21 | |  | |  |  | |  |  | | MX1 |  | |  | |  | |  |  | |  |  | | CCL5 | HSDL2 | |  |  |
|  | |  | | | | | | | | | | | |  | | |  | | IL21R |  | | TNFRSF8 |  | |  | | HLA-DOA |  |  | |  | |  |  | |  |  | | HMOX1 |  | |  | |  | |  |  | |  |  | | LCK | HTATIP2 | |  |  |
|  | |  | | | | | | | | | | | |  | | |  | | IL17B |  | | TNFSF15 |  | |  | | HLA-DPB1 |  |  | |  | |  |  | |  |  | | CD276 |  | |  | |  | |  |  | |  |  | | TRAF3IP3 | FKBP1A | |  |  |
|  | |  | | | | | | | | | | | |  | | |  | | TNFRSF9 |  | | TNFRSF14 |  | |  | | HLA-DRA |  |  | |  | |  |  | |  |  | | TIRAP |  | |  | |  | |  |  | |  |  | | CD86 | TIGIT | |  |  |
|  | |  | | | | | | | | | | | |  | | |  | | ILF2 |  | | IDO2 |  | |  | | HLA-DRB6 |  |  | |  | |  |  | |  |  | | IL33 |  | |  | |  | |  |  | |  |  | | MAL | CCR8 | |  |  |
|  | |  | | | | | | | | | | | |  | | |  | | CX3CR1 |  | | CD276 |  | |  | | HLA-L |  |  | |  | |  |  | |  |  | | PTGES |  | |  | |  | |  |  | |  |  | | LILRB1 | LTA | |  |  |
|  | |  | | | | | | | | | | | |  | | |  | | CCR8 |  | | CD40 |  | |  | | HLA-F |  |  | |  | |  |  | |  |  | | TNFRSF12A |  | |  | |  | |  |  | |  |  | | DOK2 | SLC35F2 | |  |  |
|  | |  | | | | | | | | | | | |  | | |  | | TNFSF12 |  | | TNFRSF4 |  | |  | | HLA-G |  |  | |  | |  |  | |  |  | | SCARB1 |  | |  | |  | |  |  | |  |  | | CD6 | IL21R | |  |  |
|  | |  | | | | | | | | | | | |  | | |  | | CSF3 |  | | TNFSF14 |  | |  | | HLA-DMB |  |  | |  | |  |  | |  |  | | CD14 |  | |  | |  | |  |  | |  |  | | PAG1 | AHCYL1 | |  |  |
|  | |  | | | | | | | | | | | |  | | |  | | TNFSF4 |  | | HHLA2 |  | |  | | HLA-DPA1 |  |  | |  | |  |  | |  |  | | BLNK |  | |  | |  | |  |  | |  |  | | LAX1 | SOCS2 | |  |  |
|  | |  | | | | | | | | | | | |  | | |  | | BMP3 |  | | CD244 |  | |  | |  |  |  | |  | |  |  | |  |  | | IFIT3 |  | |  | |  | |  |  | |  |  | | PLEK | ETV7 | |  |  |
|  | |  | | | | | | | | | | | |  | | |  | | CX3CL1 |  | | CD274 |  | |  | |  |  |  | |  | |  |  | |  |  | | RETNLB |  | |  | |  | |  |  | |  |  | | PIK3CD | BCL2L1 | |  |  |
|  | |  | | | | | | | | | | | |  | | |  | | BMP5 |  | | HAVCR2 |  | |  | |  |  |  | |  | |  |  | |  |  | | IFIT2 |  | |  | |  | |  |  | |  |  | | SLAMF1 | RRAGB | |  |  |
|  | |  | | | | | | | | | | | |  | | |  | | CXCR2 |  | | CD27 |  | |  | |  |  |  | |  | |  |  | |  |  | | ISG15 |  | |  | |  | |  |  | |  |  | | XCL1 | ACSL4 | |  |  |
|  | |  | | | | | | | | | | | |  | | |  | | TNFRSF10D | | | BTLA |  | |  | |  |  |  | |  | |  |  | |  |  | | OAS2 |  | |  | |  | |  |  | |  |  | | GPR171 | CHRNA6 | |  |  |
|  | |  | | | | | | | | | | | |  | | |  | | BMP2 |  | | LGALS9 |  | |  | |  |  |  | |  | |  |  | |  |  | | REL |  | |  | |  | |  |  | |  |  | | XCL2 | BATF | |  |  |
|  | |  | | | | | | | | | | | |  | | |  | | CXCL14 |  | | TMIGD2 |  | |  | |  |  |  | |  | |  |  | |  |  | | OAS3 |  | |  | |  | |  |  | |  |  | | TBX21 | LAX1 | |  |  |
|  | |  | | | | | | | | | | | |  | | |  | | CCL28 |  | | CD28 |  | |  | |  |  |  | |  | |  |  | |  |  | | CD44 |  | |  | |  | |  |  | |  |  | | CD2 | ADPRH | |  |  |
|  | |  | | | | | | | | | | | |  | | |  | | CXCL3 |  | | CD48 |  | |  | |  |  |  | |  | |  |  | |  |  | | PPARG |  | |  | |  | |  |  | |  |  | | CD53 | TNFRSF4 | |  |  |
|  | |  | | | | | | | | | | | |  | | |  | | BMP6 |  | | TNFRSF25 |  | |  | |  |  |  | |  | |  |  | |  |  | | BST2 |  | |  | |  | |  |  | |  |  | | KLHL6 | ANKRD10 | | |  |
|  | |  | | | | | | | | | | | |  | | |  | | CCL21 |  | | CD40LG |  | |  | |  |  |  | |  | |  |  | |  |  | | OAS1 |  | |  | |  | |  |  | |  |  | | SLAMF6 | CD274 | |  |  |
|  | |  | | | | | | | | | | | |  | | |  | | CXCL9 |  | | ADORA2A |  | |  | |  |  |  | |  | |  |  | |  |  | | NOX1 |  | |  | |  | |  |  | |  |  | | CD40 | CASP1 | |  |  |
|  | |  | | | | | | | | | | | |  | | |  | | CCL23 |  | | VTCN1 |  | |  | |  |  |  | |  | |  |  | |  |  | | PLA2G2A |  | |  | |  | |  |  | |  |  | | SIT1 | LY75 | |  |  |
|  | |  | | | | | | | | | | | |  | | |  | | IL6 |  | | CD160 |  | |  | |  |  |  | |  | |  |  | |  |  | | IFIT1 |  | |  | |  | |  |  | |  |  | | TNFRSF4 | NPTN | |  |  |
|  | |  | | | | | | | | | | | |  | | |  | | TNFRSF18 |  | | CD44 |  | |  | |  |  |  | |  | |  |  | |  |  | | IFITM3 |  | |  | |  | |  |  | |  |  | | CD79A | SSTR3 | |  |  |
|  | |  | | | | | | | | | | | |  | | |  | | IL17RD |  | | TNFSF18 |  | |  | |  |  |  | |  | |  |  | |  |  | | IL1RN |  | |  | |  | |  |  | |  |  | | CD247 | GRSF1 | |  |  |
|  | |  | | | | | | | | | | | |  | | |  | | IL17D |  | | TNFRSF18 |  | |  | |  |  |  | |  | |  |  | |  |  | |  |  | |  | |  | |  |  | |  |  | | LCP2 | CSF2RB | |  |  |
|  | |  | | | | | | | | | | | |  | | |  | | IL27 |  | | BTNL2 |  | |  | |  |  |  | |  | |  |  | |  |  | |  |  | |  | |  | |  |  | |  |  | | CD3D | TMEM184C | | |  |
|  | |  | | | | | | | | | | | |  | | |  | | CCL7 |  | | C10orf54 |  | |  | |  |  |  | |  | |  |  | |  |  | |  |  | |  | |  | |  |  | |  |  | | CD27 | NDFIP2 | |  |  |
|  | |  | | | | | | | | | | | |  | | |  | | IL1R1 |  | | CD200R1 |  | |  | |  |  |  | |  | |  |  | |  |  | |  |  | |  | |  | |  |  | |  |  | | SH2D1A | ZBTB38 | |  |  |
|  | |  | | | | | | | | | | | |  | | |  | | CXCR4 |  | | TNFSF4 |  | |  | |  |  |  | |  | |  |  | |  |  | |  |  | |  | |  | |  |  | |  |  | | FYB | ERI1 | |  |  |
|  | |  | | | | | | | | | | | |  | | |  | | CXCR2P1 |  | | CD200 |  | |  | |  |  |  | |  | |  |  | |  |  | |  |  | |  | |  | |  |  | |  |  | | ARHGAP30 | TRAF3 | |  |  |
|  | |  | | | | | | | | | | | |  | | |  | | TGFB1I1 |  | | NRP1 |  | |  | |  |  |  | |  | |  |  | |  |  | |  |  | |  | |  | |  |  | |  |  | | ACAP1 | NAB1 | |  |  |
|  | |  | | | | | | | | | | | |  | | |  | | IFNGR1 |  | |  |  | |  | |  |  |  | |  | |  |  | |  |  | |  |  | |  | |  | |  |  | |  |  | | CST7 | HS3ST3B1 | | |  |
|  | |  | | | | | | | | | | | |  | | |  | | IL9R |  | |  |  | |  | |  |  |  | |  | |  |  | |  |  | |  |  | |  | |  | |  |  | |  |  | | CD3G | LAYN | |  |  |
|  | |  | | | | | | | | | | | |  | | |  | | IL1RAPL1 |  | |  |  | |  | |  |  |  | |  | |  |  | |  |  | |  |  | |  | |  | |  |  | |  |  | | IL2RB | JAK1 | |  |  |
|  | |  | | | | | | | | | | | |  | | |  | | IL11 |  | |  |  | |  | |  |  |  | |  | |  |  | |  |  | |  |  | |  | |  | |  |  | |  |  | | CD3E | VDR | |  |  |
|  | |  | | | | | | | | | | | |  | | |  | | CSF1 |  | |  |  | |  | |  |  |  | |  | |  |  | |  |  | |  |  | |  | |  | |  |  | |  |  | | FCRL3 | LEPROT | |  |  |
|  | |  | | | | | | | | | | | |  | | |  | | IL20RA |  | |  |  | |  | |  |  |  | |  | |  |  | |  |  | |  |  | |  | |  | |  |  | |  |  | | CORO1A | GCNT1 | |  |  |
|  | |  | | | | | | | | | | | |  | | |  | | IL25 |  | |  |  | |  | |  |  |  | |  | |  |  | |  |  | |  |  | |  | |  | |  |  | |  |  | | ITK | PTPRJ | |  |  |
|  | |  | | | | | | | | | | | |  | | |  | | TNFRSF4 |  | |  |  | |  | |  |  |  | |  | |  |  | |  |  | |  |  | |  | |  | |  |  | |  |  | | TCL1A | IKZF2 | |  |  |
|  | |  | | | | | | | | | | | |  | | |  | | IL18 |  | |  |  | |  | |  |  |  | |  | |  |  | |  |  | |  |  | |  | |  | |  |  | |  |  | | CYBB | CSF1 | |  |  |
|  | |  | | | | | | | | | | | |  | | |  | | ILF3 |  | |  |  | |  | |  |  |  | |  | |  |  | |  |  | |  |  | |  | |  | |  |  | |  |  | | CSF2RB | ENTPD1 | |  |  |
|  | |  | | | | | | | | | | | |  | | |  | | CCL20 |  | |  |  | |  | |  |  |  | |  | |  |  | |  |  | |  |  | |  | |  | |  |  | |  |  | | IKZF1 | TNFRSF18 | | |  |
|  | |  | | | | | | | | | | | |  | | |  | | TNFRSF12A | | |  |  | |  | |  |  |  | |  | |  |  | |  |  | |  |  | |  | |  | |  |  | |  |  | | NCF4 | METTL7A | | |  |
|  | |  | | | | | | | | | | | |  | | |  | | IL6ST |  | |  |  | |  | |  |  |  | |  | |  |  | |  |  | |  |  | |  | |  | |  |  | |  |  | | DOCK2 | KSR1 | |  |  |
|  | |  | | | | | | | | | | | |  | | |  | | CXCL13 |  | |  |  | |  | |  |  |  | |  | |  |  | |  |  | |  |  | |  | |  | |  |  | |  |  | | CCR2 | SSH1 | |  |  |
|  | |  | | | | | | | | | | | |  | | |  | | IL12B |  | |  |  | |  | |  |  |  | |  | |  |  | |  |  | |  |  | |  | |  | |  |  | |  |  | | PTPRC | CADM1 | |  |  |
|  | |  | | | | | | | | | | | |  | | |  | | TNFRSF8 |  | |  |  | |  | |  |  |  | |  | |  |  | |  |  | |  |  | |  | |  | |  |  | |  |  | | PLAC8 | IL1R1 | |  |  |
|  | |  | | | | | | | | | | | |  | | |  | | IL6R |  | |  |  | |  | |  |  |  | |  | |  |  | |  |  | |  |  | |  | |  | |  |  | |  |  | | NCKAP1L | ACP5 | |  |  |
|  | |  | | | | | | | | | | | |  | | |  | | BMPR2 |  | |  |  | |  | |  |  |  | |  | |  |  | |  |  | |  |  | |  | |  | |  |  | |  |  | | IL7R | CHST7 | |  |  |
|  | |  | | | | | | | | | | | |  | | |  | | IFNE |  | |  |  | |  | |  |  |  | |  | |  |  | |  |  | |  |  | |  | |  | |  |  | |  |  | | 6-Sep | THADA | |  |  |
|  | |  | | | | | | | | | | | |  | | |  | | IL1RAPL2 |  | |  |  | |  | |  |  |  | |  | |  |  | |  |  | |  |  | |  | |  | |  |  | |  |  | | CD28 | CD177 | |  |  |
|  | |  | | | | | | | | | | | |  | | |  | | IL3RA |  | |  |  | |  | |  |  |  | |  | |  |  | |  |  | |  |  | |  | |  | |  |  | |  |  | | STAT4 | NFAT5 | |  |  |
|  | |  | | | | | | | | | | | |  | | |  | | BMP4 |  | |  |  | |  | |  |  |  | |  | |  |  | |  |  | |  |  | |  | |  | |  |  | |  |  | | CD8A | ZNF282 | |  |  |
|  | |  | | | | | | | | | | | |  | | |  | | CCL24 |  | |  |  | |  | |  |  |  | |  | |  |  | |  |  | |  |  | |  | |  | |  |  | |  |  | | LY9 | MAGEH1 | |  |  |
|  | |  | | | | | | | | | | | |  | | |  | | TNFSF13B |  | |  |  | |  | |  |  |  | |  | |  |  | |  |  | |  |  | |  | |  | |  |  | |  |  | | CD48 |  | |  |  |
|  | |  | | | | | | | | | | | |  | | |  | | CCR4 |  | |  |  | |  | |  |  |  | |  | |  |  | |  |  | |  |  | |  | |  | |  |  | |  |  | | HCST |  | |  |  |
|  | |  | | | | | | | | | | | |  | | |  | | IL2RA |  | |  |  | |  | |  |  |  | |  | |  |  | |  |  | |  |  | |  | |  | |  |  | |  |  | | PTPRCAP |  | |  |  |
|  | |  | | | | | | | | | | | |  | | |  | | IL32 |  | |  |  | |  | |  |  |  | |  | |  |  | |  |  | |  |  | |  | |  | |  |  | |  |  | | SASH3 |  | |  |  |
|  | |  | | | | | | | | | | | |  | | |  | | TNFRSF10C |  | |  |  | |  | |  |  |  | |  | |  |  | |  |  | |  |  | |  | |  | |  |  | |  |  | | ARHGAP25 | | |  |  |
|  | |  | | | | | | | | | | | |  | | |  | | IL22RA1 |  | |  |  | |  | |  |  |  | |  | |  |  | |  |  | |  |  | |  | |  | |  |  | |  |  | | LAT |  | |  |  |
|  | |  | | | | | | | | | | | |  | | |  | | BMPR1A |  | |  |  | |  | |  |  |  | |  | |  |  | |  |  | |  |  | |  | |  | |  |  | |  |  | | TRAT1 |  | |  |  |
|  | |  | | | | | | | | | | | |  | | |  | | CXCR5 |  | |  |  | |  | |  |  |  | |  | |  |  | |  |  | |  |  | |  | |  | |  |  | |  |  | | IL10RA |  | |  |  |
|  | |  | | | | | | | | | | | |  | | |  | | CXCR3 |  | |  |  | |  | |  |  |  | |  | |  |  | |  |  | |  |  | |  | |  | |  |  | |  |  | | PAX5 |  | |  |  |
|  | |  | | | | | | | | | | | |  | | |  | | IFNA8 |  | |  |  | |  | |  |  |  | |  | |  |  | |  |  | |  |  | |  | |  | |  |  | |  |  | | CCR7 |  | |  |  |
|  | |  | | | | | | | | | | | |  | | |  | | IL17REL |  | |  |  | |  | |  |  |  | |  | |  |  | |  |  | |  |  | |  | |  | |  |  | |  |  | | DOCK11 |  | |  |  |
|  | |  | | | | | | | | | | | |  | | |  | | IFNB1 |  | |  |  | |  | |  |  |  | |  | |  |  | |  |  | |  |  | |  | |  | |  |  | |  |  | | PARVG |  | |  |  |
|  | |  | | | | | | | | | | | |  | | |  | | IFNAR1 |  | |  |  | |  | |  |  |  | |  | |  |  | |  |  | |  |  | |  | |  | |  |  | |  |  | | SPNS1 |  | |  |  |
|  | |  | | | | | | | | | | | |  | | |  | | TNFRSF1B |  | |  |  | |  | |  |  |  | |  | |  |  | |  |  | |  |  | |  | |  | |  |  | |  |  | | CD52 |  | |  |  |
|  | |  | | | | | | | | | | | |  | | |  | | CCL17 |  | |  |  | |  | |  |  |  | |  | |  |  | |  |  | |  |  | |  | |  | |  |  | |  |  | | HCLS1 |  | |  |  |
|  | |  | | | | | | | | | | | |  | | |  | | IFNL1 |  | |  |  | |  | |  |  |  | |  | |  |  | |  |  | |  |  | |  | |  | |  |  | |  |  | | ARHGAP9 | | |  |  |
|  | |  | | | | | | | | | | | |  | | |  | | IL16 |  | |  |  | |  | |  |  |  | |  | |  |  | |  |  | |  |  | |  | |  | |  |  | |  |  | | GIMAP6 |  | |  |  |
|  | |  | | | | | | | | | | | |  | | |  | | IL1RL1 |  | |  |  | |  | |  |  |  | |  | |  |  | |  |  | |  |  | |  | |  | |  |  | |  |  | | PRKCB |  | |  |  |
|  | |  | | | | | | | | | | | |  | | |  | | ILK |  | |  |  | |  | |  |  |  | |  | |  |  | |  |  | |  |  | |  | |  | |  |  | |  |  | | MS4A1 |  | |  |  |
|  | |  | | | | | | | | | | | |  | | |  | | CCL25 |  | |  |  | |  | |  |  |  | |  | |  |  | |  |  | |  |  | |  | |  | |  |  | |  |  | | GPR18 |  | |  |  |
|  | |  | | | | | | | | | | | |  | | |  | | ILDR2 |  | |  |  | |  | |  |  |  | |  | |  |  | |  |  | |  |  | |  | |  | |  |  | |  |  | | TBC1D10C | | |  |  |
|  | |  | | | | | | | | | | | |  | | |  | | CXCR1 |  | |  |  | |  | |  |  |  | |  | |  |  | |  |  | |  |  | |  | |  | |  |  | |  |  | | GVINP1 |  | |  |  |
|  | |  | | | | | | | | | | | |  | | |  | | IL36RN |  | |  |  | |  | |  |  |  | |  | |  |  | |  |  | |  |  | |  | |  | |  |  | |  |  | | P2RY8 |  | |  |  |
|  | |  | | | | | | | | | | | |  | | |  | | IL34 |  | |  |  | |  | |  |  |  | |  | |  |  | |  |  | |  |  | |  | |  | |  |  | |  |  | | EVI2B |  | |  |  |
|  | |  | | | | | | | | | | | |  | | |  | | TGFB1 |  | |  |  | |  | |  |  |  | |  | |  |  | |  |  | |  |  | |  | |  | |  |  | |  |  | | VAMP5 |  | |  |  |
|  | |  | | | | | | | | | | | |  | | |  | | IFNG |  | |  |  | |  | |  |  |  | |  | |  |  | |  |  | |  |  | |  | |  | |  |  | |  |  | | KLRK1 |  | |  |  |
|  | |  | | | | | | | | | | | |  | | |  | | IL19 |  | |  |  | |  | |  |  |  | |  | |  |  | |  |  | |  |  | |  | |  | |  |  | |  |  | | SELL |  | |  |  |
|  | |  | | | | | | | | | | | |  | | |  | | ILKAP |  | |  |  | |  | |  |  |  | |  | |  |  | |  |  | |  |  | |  | |  | |  |  | |  |  | | MPEG1 |  | |  |  |
|  | |  | | | | | | | | | | | |  | | |  | | BMP2K |  | |  |  | |  | |  |  |  | |  | |  |  | |  |  | |  |  | |  | |  | |  |  | |  |  | | MS4A6A |  | |  |  |
|  | |  | | | | | | | | | | | |  | | |  | | CCR10 |  | |  |  | |  | |  |  |  | |  | |  |  | |  |  | |  |  | |  | |  | |  |  | |  |  | | ARHGAP15 | | |  |  |
|  | |  | | | | | | | | | | | |  | | |  | | ILDR1 |  | |  |  | |  | |  |  |  | |  | |  |  | |  |  | |  |  | |  | |  | |  |  | |  |  | | MFNG |  | |  |  |
|  | |  | | | | | | | | | | | |  | | |  | | EPO |  | |  |  | |  | |  |  |  | |  | |  |  | |  |  | |  |  | |  | |  | |  |  | |  |  | | GZMK |  | |  |  |
|  | |  | | | | | | | | | | | |  | | |  | | CCR7 |  | |  |  | |  | |  |  |  | |  | |  |  | |  |  | |  |  | |  | |  | |  |  | |  |  | | SELPLG |  | |  |  |
|  | |  | | | | | | | | | | | |  | | |  | | IL17C |  | |  |  | |  | |  |  |  | |  | |  |  | |  |  | |  |  | |  | |  | |  |  | |  |  | | TARP |  | |  |  |
|  | |  | | | | | | | | | | | |  | | |  | | IL23A |  | |  |  | |  | |  |  |  | |  | |  |  | |  |  | |  |  | |  | |  | |  |  | |  |  | | GIMAP7 |  | |  |  |
|  | |  | | | | | | | | | | | |  | | |  | | CCR5 |  | |  |  | |  | |  |  |  | |  | |  |  | |  |  | |  |  | |  | |  | |  |  | |  |  | | FAM65B |  | |  |  |
|  | |  | | | | | | | | | | | |  | | |  | | IL7 |  | |  |  | |  | |  |  |  | |  | |  |  | |  |  | |  |  | |  | |  | |  |  | |  |  | | INPP5D |  | |  |  |
|  | |  | | | | | | | | | | | |  | | |  | | EPOR |  | |  |  | |  | |  |  |  | |  | |  |  | |  |  | |  |  | |  | |  | |  |  | |  |  | | ITGA4 |  | |  |  |
|  | |  | | | | | | | | | | | |  | | |  | | CCL13 |  | |  |  | |  | |  |  |  | |  | |  |  | |  |  | |  |  | |  | |  | |  |  | |  |  | | MZB1 |  | |  |  |
|  | |  | | | | | | | | | | | |  | | |  | | IL2RG |  | |  |  | |  | |  |  |  | |  | |  |  | |  |  | |  |  | |  | |  | |  |  | |  |  | | GPSM3 |  | |  |  |
|  | |  | | | | | | | | | | | |  | | |  | | IL31RA |  | |  |  | |  | |  |  |  | |  | |  |  | |  |  | |  |  | |  | |  | |  |  | |  |  | | STK10 |  | |  |  |
|  | |  | | | | | | | | | | | |  | | |  | | TNFAIP6 |  | |  |  | |  | |  |  |  | |  | |  |  | |  |  | |  |  | |  | |  | |  |  | |  |  | | CLEC2D |  | |  |  |
|  | |  | | | | | | | | | | | |  | | |  | | IFNL2 |  | |  |  | |  | |  |  |  | |  | |  |  | |  |  | |  |  | |  | |  | |  |  | |  |  | | IL16 |  | |  |  |
|  | |  | | | | | | | | | | | |  | | |  | | BMP1 |  | |  |  | |  | |  |  |  | |  | |  |  | |  |  | |  |  | |  | |  | |  |  | |  |  | | NLRC3 |  | |  |  |
|  | |  | | | | | | | | | | | |  | | |  | | IL12RB1 |  | |  |  | |  | |  |  |  | |  | |  |  | |  |  | |  |  | |  | |  | |  |  | |  |  | | GIMAP5 |  | |  |  |
|  | |  | | | | | | | | | | | |  | | |  | | TNFAIP8 |  | |  |  | |  | |  |  |  | |  | |  |  | |  |  | |  |  | |  | |  | |  |  | |  |  | | GIMAP4 |  | |  |  |
|  | |  | | | | | | | | | | | |  | | |  | | IL4R |  | |  |  | |  | |  |  |  | |  | |  |  | |  |  | |  |  | |  | |  | |  |  | |  |  | | IFFO1 |  | |  |  |
|  | |  | | | | | | | | | | | |  | | |  | | TNFRSF6B |  | |  |  | |  | |  |  |  | |  | |  |  | |  |  | |  |  | |  | |  | |  |  | |  |  | | CFH |  | |  |  |
|  | |  | | | | | | | | | | | |  | | |  | | TNFAIP8L1 |  | |  |  | |  | |  |  |  | |  | |  |  | |  |  | |  |  | |  | |  | |  |  | |  |  | | PVRIG |  | |  |  |
|  | |  | | | | | | | | | | | |  | | |  | | TNFRSF10B |  | |  |  | |  | |  |  |  | |  | |  |  | |  |  | |  |  | |  | |  | |  |  | |  |  | | CFHR1 |  | |  |  |
|  | |  | | | | | | | | | | | |  | | |  | | IFNL3 |  | |  |  | |  | |  |  |  | |  | |  |  | |  |  | |  |  | |  | |  | |  |  | |  |  | |  |  | |  |  |
|  | |  | | | | | | | | | | | |  | | |  | | CCL5 |  | |  |  | |  | |  |  |  | |  | |  |  | |  |  | |  |  | |  | |  | |  |  | |  |  | |  |  | |  |  |
|  | |  | | | | | | | | | | | |  | | |  | | CXCL6 |  | |  |  | |  | |  |  |  | |  | |  |  | |  |  | |  |  | |  | |  | |  |  | |  |  | |  |  | |  |  |
|  | |  | | | | | | | | | | | |  | | |  | | CXCL1 |  | |  |  | |  | |  |  |  | |  | |  |  | |  |  | |  |  | |  | |  | |  |  | |  |  | |  |  | |  |  |
|  | |  | | | | | | | | | | | |  | | |  | | CCR3 |  | |  |  | |  | |  |  |  | |  | |  |  | |  |  | |  |  | |  | |  | |  |  | |  |  | |  |  | |  |  |
|  | |  | | | | | | | | | | | |  | | |  | | TNFSF11 |  | |  |  | |  | |  |  |  | |  | |  |  | |  |  | |  |  | |  | |  | |  |  | |  |  | |  |  | |  |  |
|  | |  | | | | | | | | | | | |  | | |  | | CSF1R |  | |  |  | |  | |  |  |  | |  | |  |  | |  |  | |  |  | |  | |  | |  |  | |  |  | |  |  | |  |  |
|  | |  | | | | | | | | | | | |  | | |  | | IL21 |  | |  |  | |  | |  |  |  | |  | |  |  | |  |  | |  |  | |  | |  | |  |  | |  |  | |  |  | |  |  |
|  | |  | | | | | | | | | | | |  | | |  | | IL1RAP |  | |  |  | |  | |  |  |  | |  | |  |  | |  |  | |  |  | |  | |  | |  |  | |  |  | |  |  | |  |  |
|  | |  | | | | | | | | | | | |  | | |  | | IL12RB2 |  | |  |  | |  | |  |  |  | |  | |  |  | |  |  | |  |  | |  | |  | |  |  | |  |  | |  |  | |  |  |
|  | |  | | | | | | | | | | | |  | | |  | | CCL1 |  | |  |  | |  | |  |  |  | |  | |  |  | |  |  | |  |  | |  | |  | |  |  | |  |  | |  |  | |  |  |
|  | |  | | | | | | | | | | | |  | | |  | | IL17RA |  | |  |  | |  | |  |  |  | |  | |  |  | |  |  | |  |  | |  | |  | |  |  | |  |  | |  |  | |  |  |
|  | |  | | | | | | | | | | | |  | | |  | | CCR1 |  | |  |  | |  | |  |  |  | |  | |  |  | |  |  | |  |  | |  | |  | |  |  | |  |  | |  |  | |  |  |
|  | |  | | | | | | | | | | | |  | | |  | | IL1RN |  | |  |  | |  | |  |  |  | |  | |  |  | |  |  | |  |  | |  | |  | |  |  | |  |  | |  |  | |  |  |
|  | |  | | | | | | | | | | | |  | | |  | | TNFRSF11B |  | |  |  | |  | |  |  |  | |  | |  |  | |  |  | |  |  | |  | |  | |  |  | |  |  | |  |  | |  |  |
|  | |  | | | | | | | | | | | |  | | |  | | TNFRSF14 |  | |  |  | |  | |  |  |  | |  | |  |  | |  |  | |  |  | |  | |  | |  |  | |  |  | |  |  | |  |  |
|  | |  | | | | | | | | | | | |  | | |  | | IL13 |  | |  |  | |  | |  |  |  | |  | |  |  | |  |  | |  |  | |  | |  | |  |  | |  |  | |  |  | |  |  |
|  | |  | | | | | | | | | | | |  | | |  | | IL2RB |  | |  |  | |  | |  |  |  | |  | |  |  | |  |  | |  |  | |  | |  | |  |  | |  |  | |  |  | |  |  |
|  | |  | | | | | | | | | | | |  | | |  | | BMP8B |  | |  |  | |  | |  |  |  | |  | |  |  | |  |  | |  |  | |  | |  | |  |  | |  |  | |  |  | |  |  |
|  | |  | | | | | | | | | | | |  | | |  | | CCL2 |  | |  |  | |  | |  |  |  | |  | |  |  | |  |  | |  |  | |  | |  | |  |  | |  |  | |  |  | |  |  |
|  | |  | | | | | | | | | | | |  | | |  | | IL24 |  | |  |  | |  | |  |  |  | |  | |  |  | |  |  | |  |  | |  | |  | |  |  | |  |  | |  |  | |  |  |
|  | |  | | | | | | | | | | | |  | | |  | | IL18RAP |  | |  |  | |  | |  |  |  | |  | |  |  | |  |  | |  |  | |  | |  | |  |  | |  |  | |  |  | |  |  |
|  | |  | | | | | | | | | | | |  | | |  | | TGFBI |  | |  |  | |  | |  |  |  | |  | |  |  | |  |  | |  |  | |  | |  | |  |  | |  |  | |  |  | |  |  |
|  | |  | | | | | | | | | | | |  | | |  | | TNFSF10 |  | |  |  | |  | |  |  |  | |  | |  |  | |  |  | |  |  | |  | |  | |  |  | |  |  | |  |  | |  |  |
|  | |  | | | | | | | | | | | |  | | |  | | TNFRSF11A | | |  |  | |  | |  |  |  | |  | |  |  | |  |  | |  |  | |  | |  | |  |  | |  |  | |  |  | |  |  |
|  | |  | | | | | | | | | | | |  | | |  | | CXCL5 |  | |  |  | |  | |  |  |  | |  | |  |  | |  |  | |  |  | |  | |  | |  |  | |  |  | |  |  | |  |  |
|  | |  | | | | | | | | | | | |  | | |  | | IL5RA |  | |  |  | |  | |  |  |  | |  | |  |  | |  |  | |  |  | |  | |  | |  |  | |  |  | |  |  | |  |  |
|  | |  | | | | | | | | | | | |  | | |  | | TNFSF9 |  | |  |  | |  | |  |  |  | |  | |  |  | |  |  | |  |  | |  | |  | |  |  | |  |  | |  |  | |  |  |
|  | |  | | | | | | | | | | | |  | | |  | | IL1RL2 |  | |  |  | |  | |  |  |  | |  | |  |  | |  |  | |  |  | |  | |  | |  |  | |  |  | |  |  | |  |  |
|  | |  | | | | | | | | | | | |  | | |  | | TNFRSF13C |  | |  |  | |  | |  |  |  | |  | |  |  | |  |  | |  |  | |  | |  | |  |  | |  |  | |  |  | |  |  |
|  | |  | | | | | | | | | | | |  | | |  | | IL36G |  | |  |  | |  | |  |  |  | |  | |  |  | |  |  | |  |  | |  | |  | |  |  | |  |  | |  |  | |  |  |
|  | |  | | | | | | | | | | | |  | | |  | | IL15RA |  | |  |  | |  | |  |  |  | |  | |  |  | |  |  | |  |  | |  | |  | |  |  | |  |  | |  |  | |  |  |
|  | |  | | | | | | | | | | | |  | | |  | | TNFRSF21 |  | |  |  | |  | |  |  |  | |  | |  |  | |  |  | |  |  | |  | |  | |  |  | |  |  | |  |  | |  |  |
|  | |  | | | | | | | | | | | |  | | |  | | CXCL8 |  | |  |  | |  | |  |  |  | |  | |  |  | |  |  | |  |  | |  | |  | |  |  | |  |  | |  |  | |  |  |
|  | |  | | | | | | | | | | | |  | | |  | | IL22RA2 |  | |  |  | |  | |  |  |  | |  | |  |  | |  |  | |  |  | |  | |  | |  |  | |  |  | |  |  | |  |  |
|  | |  | | | | | | | | | | | |  | | |  | | TNFAIP8L2 |  | |  |  | |  | |  |  |  | |  | |  |  | |  |  | |  |  | |  | |  | |  |  | |  |  | |  |  | |  |  |
|  | |  | | | | | | | | | | | |  | | |  | | IL18R1 |  | |  |  | |  | |  |  |  | |  | |  |  | |  |  | |  |  | |  | |  | |  |  | |  |  | |  |  | |  |  |
|  | |  | | | | | | | | | | | |  | | |  | | IFNLR1 |  | |  |  | |  | |  |  |  | |  | |  |  | |  |  | |  |  | |  | |  | |  |  | |  |  | |  |  | |  |  |
|  | |  | | | | | | | | | | | |  | | |  | | CXCR6 |  | |  |  | |  | |  |  |  | |  | |  |  | |  |  | |  |  | |  | |  | |  |  | |  |  | |  |  | |  |  |
|  | |  | | | | | | | | | | | |  | | |  | | CCL3L3 |  | |  |  | |  | |  |  |  | |  | |  |  | |  |  | |  |  | |  | |  | |  |  | |  |  | |  |  | |  |  |
|  | |  | | | | | | | | | | | |  | | |  | | TNFRSF1A |  | |  |  | |  | |  |  |  | |  | |  |  | |  |  | |  |  | |  | |  | |  |  | |  |  | |  |  | |  |  |
|  | |  | | | | | | | | | | | |  | | |  | | IL17RE |  | |  |  | |  | |  |  |  | |  | |  |  | |  |  | |  |  | |  | |  | |  |  | |  |  | |  |  | |  |  |
|  | |  | | | | | | | | | | | |  | | |  | | IFNGR2 |  | |  |  | |  | |  |  |  | |  | |  |  | |  |  | |  |  | |  | |  | |  |  | |  |  | |  |  | |  |  |
|  | |  | | | | | | | | | | | |  | | |  | | IL17RC |  | |  |  | |  | |  |  |  | |  | |  |  | |  |  | |  |  | |  | |  | |  |  | |  |  | |  |  | |  |  |
|  | |  | | | | | | | | | | | |  | | |  | | TNFAIP8L3 |  | |  |  | |  | |  |  |  | |  | |  |  | |  |  | |  |  | |  | |  | |  |  | |  |  | |  |  | |  |  |
|  | |  | | | | | | | | | | | |  | | |  | | ILVBL |  | |  |  | |  | |  |  |  | |  | |  |  | |  |  | |  |  | |  | |  | |  |  | |  |  | |  |  | |  |  |
|  | |  | | | | | | | | | | | |  | | |  | | TGFBRAP1 |  | |  |  | |  | |  |  |  | |  | |  |  | |  |  | |  |  | |  | |  | |  |  | |  |  | |  |  | |  |  |
|  | |  | | | | | | | | | | | |  | | |  | | CCL4L1 |  | |  |  | |  | |  |  |  | |  | |  |  | |  |  | |  |  | |  | |  | |  |  | |  |  | |  |  | |  |  |
|  | |  | | | | | | | | | | | |  | | |  | | CSF2RA |  | |  |  | |  | |  |  |  | |  | |  |  | |  |  | |  |  | |  | |  | |  |  | |  |  | |  |  | |  |  |
|  | |  | | | | | | | | | | | |  | | |  | | CCRN4L |  | |  |  | |  | |  |  |  | |  | |  |  | |  |  | |  |  | |  | |  | |  |  | |  |  | |  |  | |  |  |
|  | |  | | | | | | | | | | | |  | | |  | | CCL26 |  | |  |  | |  | |  |  |  | |  | |  |  | |  |  | |  |  | |  | |  | |  |  | |  |  | |  |  | |  |  |
|  | |  | | | | | | | | | | | |  | | |  | | TNFAIP1 |  | |  |  | |  | |  |  |  | |  | |  |  | |  |  | |  |  | |  | |  | |  |  | |  |  | |  |  | |  |  |
|  | |  | | | | | | | | | | | |  | | |  | | CCRL2 |  | |  |  | |  | |  |  |  | |  | |  |  | |  |  | |  |  | |  | |  | |  |  | |  |  | |  |  | |  |  |
|  | |  | | | | | | | | | | | |  | | |  | | IFNA10 |  | |  |  | |  | |  |  |  | |  | |  |  | |  |  | |  |  | |  | |  | |  |  | |  |  | |  |  | |  |  |
|  | |  | | | | | | | | | | | |  | | |  | | TNFRSF17 |  | |  |  | |  | |  |  |  | |  | |  |  | |  |  | |  |  | |  | |  | |  |  | |  |  | |  |  | |  |  |
|  | |  | | | | | | | | | | | |  | | |  | | IFNA13 |  | |  |  | |  | |  |  |  | |  | |  |  | |  |  | |  |  | |  | |  | |  |  | |  |  | |  |  | |  |  |
|  | |  | | | | | | | | | | | |  | | |  | | IL20 |  | |  |  | |  | |  |  |  | |  | |  |  | |  |  | |  |  | |  | |  | |  |  | |  |  | |  |  | |  |  |
|  | |  | | | | | | | | | | | |  | | |  | | IL18BP |  | |  |  | |  | |  |  |  | |  | |  |  | |  |  | |  |  | |  | |  | |  |  | |  |  | |  |  | |  |  |
|  | |  | | | | | | | | | | | |  | | |  | | CCL3L1 |  | |  |  | |  | |  |  |  | |  | |  |  | |  |  | |  |  | |  | |  | |  |  | |  |  | |  |  | |  |  |
|  | |  | | | | | | | | | | | |  | | |  | | TNFSF12-TNFSF13 | | |  |  | |  | |  |  |  | |  | |  |  | |  |  | |  |  | |  | |  | |  |  | |  |  | |  |  | |  |  |
|  | |  | | | | | | | | | | | |  | | |  | | IL5 |  | |  |  | |  | |  |  |  | |  | |  |  | |  |  | |  |  | |  | |  | |  |  | |  |  | |  |  | |  |  |
|  | |  | | | | | | | | | | | |  | | |  | | IL23R |  | |  |  | |  | |  |  |  | |  | |  |  | |  |  | |  |  | |  | |  | |  |  | |  |  | |  |  | |  |  |
|  | |  | | | | | | | | | | | |  | | |  | | IL26 |  | |  |  | |  | |  |  |  | |  | |  |  | |  |  | |  |  | |  | |  | |  |  | |  |  | |  |  | |  |  |
|  | |  | | | | | | | | | | | |  | | |  | | TNF |  | |  |  | |  | |  |  |  | |  | |  |  | |  |  | |  |  | |  | |  | |  |  | |  |  | |  |  | |  |  |
|  | |  | | | | | | | | | | | |  | | |  | | TGFA |  | |  |  | |  | |  |  |  | |  | |  |  | |  |  | |  |  | |  | |  | |  |  | |  |  | |  |  | |  |  |
|  | |  | | | | | | | | | | | |  | | |  | | CSF2 |  | |  |  | |  | |  |  |  | |  | |  |  | |  |  | |  |  | |  | |  | |  |  | |  |  | |  |  | |  |  |
|  | |  | | | | | | | | | | | |  | | |  | | IL1F10 |  | |  |  | |  | |  |  |  | |  | |  |  | |  |  | |  |  | |  | |  | |  |  | |  |  | |  |  | |  |  |
|  | |  | | | | | | | | | | | |  | | |  | | CXCL17 |  | |  |  | |  | |  |  |  | |  | |  |  | |  |  | |  |  | |  | |  | |  |  | |  |  | |  |  | |  |  |
|  | |  | | | | | | | | | | | |  | | |  | | TNFSF13 |  | |  |  | |  | |  |  |  | |  | |  |  | |  |  | |  |  | |  | |  | |  |  | |  |  | |  |  | |  |  |
|  | |  | | | | | | | | | | | |  | | |  | | IFNA4 |  | |  |  | |  | |  |  |  | |  | |  |  | |  |  | |  |  | |  | |  | |  |  | |  |  | |  |  | |  |  |
|  | |  | | | | | | | | | | | |  | | |  | | IL37 |  | |  |  | |  | |  |  |  | |  | |  |  | |  |  | |  |  | |  | |  | |  |  | |  |  | |  |  | |  |  |
|  | |  | | | | | | | | | | | |  | | |  | | IL12A |  | |  |  | |  | |  |  |  | |  | |  |  | |  |  | |  |  | |  | |  | |  |  | |  |  | |  |  | |  |  |
|  | |  | | | | | | | | | | | |  | | |  | | IL7R |  | |  |  | |  | |  |  |  | |  | |  |  | |  |  | |  |  | |  | |  | |  |  | |  |  | |  |  | |  |  |
|  | |  | | | | | | | | | | | |  | | |  | | IFNA1 |  | |  |  | |  | |  |  |  | |  | |  |  | |  |  | |  |  | |  | |  | |  |  | |  |  | |  |  | |  |  |
|  | |  | | | | | | | | | | | |  | | |  | | IL1A |  | |  |  | |  | |  |  |  | |  | |  |  | |  |  | |  |  | |  | |  | |  |  | |  |  | |  |  | |  |  |
|  | |  | | | | | | | | | | | |  | | |  | | IL4 |  | |  |  | |  | |  |  |  | |  | |  |  | |  |  | |  |  | |  | |  | |  |  | |  |  | |  |  | |  |  |
|  | |  | | | | | | | | | | | |  | | |  | | IL2 |  | |  |  | |  | |  |  |  | |  | |  |  | |  |  | |  |  | |  | |  | |  |  | |  |  | |  |  | |  |  |
|  | |  | | | | | | | | | | | |  | | |  | | CCL22 |  | |  |  | |  | |  |  |  | |  | |  |  | |  |  | |  |  | |  | |  | |  |  | |  |  | |  |  | |  |  |
|  | |  | | | | | | | | | | | |  | | |  | | CSF3R |  | |  |  | |  | |  |  |  | |  | |  |  | |  |  | |  |  | |  | |  | |  |  | |  |  | |  |  | |  |  |
|  | |  | | | | | | | | | | | |  | | |  | | IL10 |  | |  |  | |  | |  |  |  | |  | |  |  | |  |  | |  |  | |  | |  | |  |  | |  |  | |  |  | |  |  |
|  | |  | | | | | | | | | | | |  | | |  | | IFNK |  | |  |  | |  | |  |  |  | |  | |  |  | |  |  | |  |  | |  | |  | |  |  | |  |  | |  |  | |  |  |
|  | |  | | | | | | | | | | | |  | | |  | | TGFB2 |  | |  |  | |  | |  |  |  | |  | |  |  | |  |  | |  |  | |  | |  | |  |  | |  |  | |  |  | |  |  |
|  | |  | | | | | | | | | | | |  | | |  | | IL1R2 |  | |  |  | |  | |  |  |  | |  | |  |  | |  |  | |  |  | |  | |  | |  |  | |  |  | |  |  | |  |  |
|  | |  | | | | | | | | | | | |  | | |  | | IL1B |  | |  |  | |  | |  |  |  | |  | |  |  | |  |  | |  |  | |  | |  | |  |  | |  |  | |  |  | |  |  |
|  | |  | | | | | | | | | | | |  | | |  | | IL17F |  | |  |  | |  | |  |  |  | |  | |  |  | |  |  | |  |  | |  | |  | |  |  | |  |  | |  |  | |  |  |
|  | |  | | | | | | | | | | | |  | | |  | | IL27RA |  | |  |  | |  | |  |  |  | |  | |  |  | |  |  | |  |  | |  | |  | |  |  | |  |  | |  |  | |  |  |
|  | |  | | | | | | | | | | | |  | | |  | | IL15 |  | |  |  | |  | |  |  |  | |  | |  |  | |  |  | |  |  | |  | |  | |  |  | |  |  | |  |  | |  |  |
|  | |  | | | | | | | | | | | |  | | |  | | TNFSF8 |  | |  |  | |  | |  |  |  | |  | |  |  | |  |  | |  |  | |  | |  | |  |  | |  |  | |  |  | |  |  |
|  | |  | | | | | | | | | | | |  | | |  | | IL36B |  | |  |  | |  | |  |  |  | |  | |  |  | |  |  | |  |  | |  | |  | |  |  | |  |  | |  |  | |  |  |
|  | |  | | | | | | | | | | | |  | | |  | | XCL1 |  | |  |  | |  | |  |  |  | |  | |  |  | |  |  | |  |  | |  | |  | |  |  | |  |  | |  |  | |  |  |
|  | |  | | | | | | | | | | | |  | | |  | | CXCL16 |  | |  |  | |  | |  |  |  | |  | |  |  | |  |  | |  |  | |  | |  | |  |  | |  |  | |  |  | |  |  |
|  | |  | | | | | | | | | | | |  | | |  | | TNFRSF19 |  | |  |  | |  | |  |  |  | |  | |  |  | |  |  | |  |  | |  | |  | |  |  | |  |  | |  |  | |  |  |
|  | |  | | | | | | | | | | | |  | | |  | | IL3 |  | |  |  | |  | |  |  |  | |  | |  |  | |  |  | |  |  | |  | |  | |  |  | |  |  | |  |  | |  |  |
|  | |  | | | | | | | | | | | |  | | |  | | CCL3 |  | |  |  | |  | |  |  |  | |  | |  |  | |  |  | |  |  | |  | |  | |  |  | |  |  | |  |  | |  |  |
|  | |  | | | | | | | | | | | |  | | |  | | IFNA2 |  | |  |  | |  | |  |  |  | |  | |  |  | |  |  | |  |  | |  | |  | |  |  | |  |  | |  |  | |  |  |
|  | |  | | | | | | | | | | | |  | | |  | | BMPR1B |  | |  |  | |  | |  |  |  | |  | |  |  | |  |  | |  |  | |  | |  | |  |  | |  |  | |  |  | |  |  |
|  | |  | | | | | | | | | | | |  | | |  | | IFNA21 |  | |  |  | |  | |  |  |  | |  | |  |  | |  |  | |  |  | |  | |  | |  |  | |  |  | |  |  | |  |  |
|  | |  | | | | | | | | | | | |  | | |  | | TNFSF18 |  | |  |  | |  | |  |  |  | |  | |  |  | |  |  | |  |  | |  | |  | |  |  | |  |  | |  |  | |  |  |
|  | |  | | | | | | | | | | | |  | | |  | | CCL8 |  | |  |  | |  | |  |  |  | |  | |  |  | |  |  | |  |  | |  | |  | |  |  | |  |  | |  |  | |  |  |
|  | |  | | | | | | | | | | | |  | | |  | | IL17RB |  | |  |  | |  | |  |  |  | |  | |  |  | |  |  | |  |  | |  | |  | |  |  | |  |  | |  |  | |  |  |
|  | |  | | | | | | | | | | | |  | | |  | | TNFRSF25 |  | |  |  | |  | |  |  |  | |  | |  |  | |  |  | |  |  | |  | |  | |  |  | |  |  | |  |  | |  |  |
|  | |  | | | | | | | | | | | |  | | |  | | IL22 |  | |  |  | |  | |  |  |  | |  | |  |  | |  |  | |  |  | |  | |  | |  |  | |  |  | |  |  | |  |  |
|  | |  | | | | | | | | | | | |  | | |  | | IL10RB |  | |  |  | |  | |  |  |  | |  | |  |  | |  |  | |  |  | |  | |  | |  |  | |  |  | |  |  | |  |  |
|  | |  | | | | | | | | | | | |  | | |  | | IFNAR2 |  | |  |  | |  | |  |  |  | |  | |  |  | |  |  | |  |  | |  | |  | |  |  | |  |  | |  |  | |  |  |
|  | |  | | | | | | | | | | | |  | | |  | | CCL18 |  | |  |  | |  | |  |  |  | |  | |  |  | |  |  | |  |  | |  | |  | |  |  | |  |  | |  |  | |  |  |
|  | |  | | | | | | | | | | | |  | | |  | | IFNA16 |  | |  |  | |  | |  |  |  | |  | |  |  | |  |  | |  |  | |  | |  | |  |  | |  |  | |  |  | |  |  |
|  | |  | | | | | | | | | | | |  | | |  | | CSF2RB |  | |  |  | |  | |  |  |  | |  | |  |  | |  |  | |  |  | |  | |  | |  |  | |  |  | |  |  | |  |  |
|  | |  | | | | | | | | | | | |  | | |  | | IL36A |  | |  |  | |  | |  |  |  | |  | |  |  | |  |  | |  |  | |  | |  | |  |  | |  |  | |  |  | |  |  |
|  | |  | | | | | | | | | | | |  | | |  | | TNFAIP3 |  | |  |  | |  | |  |  |  | |  | |  |  | |  |  | |  |  | |  | |  | |  |  | |  |  | |  |  | |  |  |
|  | |  | | | | | | | | | | | |  | | |  | | IL13RA2 |  | |  |  | |  | |  |  |  | |  | |  |  | |  |  | |  |  | |  | |  | |  |  | |  |  | |  |  | |  |  |
|  | |  | | | | | | | | | | | |  | | |  | | IL13RA1 |  | |  |  | |  | |  |  |  | |  | |  |  | |  |  | |  |  | |  | |  | |  |  | |  |  | |  |  | |  |  |
|  | |  | | | | | | | | | | | |  | | |  | | CCR9 |  | |  |  | |  | |  |  |  | |  | |  |  | |  |  | |  |  | |  | |  | |  |  | |  |  | |  |  | |  |  |
|  | |  | | | | | | | | | | | |  | | |  | | TNFRSF10A | | |  |  | |  | |  |  |  | |  | |  |  | |  |  | |  |  | |  | |  | |  |  | |  |  | |  |  | |  |  |
|  | |  | | | | | | | | | | | |  | | |  | | IFNA7 |  | |  |  | |  | |  |  |  | |  | |  |  | |  |  | |  |  | |  | |  | |  |  | |  |  | |  |  | |  |  |
|  | |  | | | | | | | | | | | |  | | |  | | IFNW1 |  | |  |  | |  | |  |  |  | |  | |  |  | |  |  | |  |  | |  | |  | |  |  | |  |  | |  |  | |  |  |
|  | |  | | | | | | | | | | | |  | | |  | | XCL2 |  | |  |  | |  | |  |  |  | |  | |  |  | |  |  | |  |  | |  | |  | |  |  | |  |  | |  |  | |  |  |
|  | |  | | | | | | | | | | | |  | | |  | | TNFSF14 |  | |  |  | |  | |  |  |  | |  | |  |  | |  |  | |  |  | |  | |  | |  |  | |  |  | |  |  | |  |  |
|  | |  | | | | | | | | | | | |  | | |  | | CCR2 |  | |  |  | |  | |  |  |  | |  | |  |  | |  |  | |  |  | |  | |  | |  |  | |  |  | |  |  | |  |  |
|  | |  | | | | | | | | | | | |  | | |  | | BMP15 |  | |  |  | |  | |  |  |  | |  | |  |  | |  |  | |  |  | |  | |  | |  |  | |  |  | |  |  | |  |  |
|  | |  | | | | | | | | | | | |  | | |  | | BMP10 |  | |  |  | |  | |  |  |  | |  | |  |  | |  |  | |  |  | |  | |  | |  |  | |  |  | |  |  | |  |  |
|  | |  | | | | | | | | | | | |  | | |  | | CCL15-CCL14 | | |  |  | |  | |  |  |  | |  | |  |  | |  |  | |  |  | |  | |  | |  |  | |  |  | |  |  | |  |  |
|  | |  | | | | | | | | | | | |  | | |  | | TGFBR1 |  | |  |  | |  | |  |  |  | |  | |  |  | |  |  | |  |  | |  | |  | |  |  | |  |  | |  |  | |  |  |
|  | |  | | | | | | | | | | | |  | | |  | | IFNA5 |  | |  |  | |  | |  |  |  | |  | |  |  | |  |  | |  |  | |  | |  | |  |  | |  |  | |  |  | |  |  |
|  | |  | | | | | | | | | | | |  | | |  | | BMP7 |  | |  |  | |  | |  |  |  | |  | |  |  | |  |  | |  |  | |  | |  | |  |  | |  |  | |  |  | |  |  |
|  | |  | | | | | | | | | | | |  | | |  | | IFNA14 |  | |  |  | |  | |  |  |  | |  | |  |  | |  |  | |  |  | |  | |  | |  |  | |  |  | |  |  | |  |  |
|  | |  | | | | | | | | | | | |  | | |  | | IL20RB |  | |  |  | |  | |  |  |  | |  | |  |  | |  |  | |  |  | |  | |  | |  |  | |  |  | |  |  | |  |  |
|  | |  | | | | | | | | | | | |  | | |  | | IL10RA |  | |  |  | |  | |  |  |  | |  | |  |  | |  |  | |  |  | |  | |  | |  |  | |  |  | |  |  | |  |  |
|  | |  | | | | | | | | | | | |  | | |  | | IFNA17 |  | |  |  | |  | |  |  |  | |  | |  |  | |  |  | |  |  | |  | |  | |  |  | |  |  | |  |  | |  |  |
|  | |  | | | | | | | | | | | |  | | |  | | CCR6 |  | |  |  | |  | |  |  |  | |  | |  |  | |  |  | |  |  | |  | |  | |  |  | |  |  | |  |  | |  |  |
|  | |  | | | | | | | | | | | |  | | |  | | TGFB3 |  | |  |  | |  | |  |  |  | |  | |  |  | |  |  | |  |  | |  | |  | |  |  | |  |  | |  |  | |  |  |
|  | |  | | | | | | | | | | | |  | | |  | | CCL15 |  | |  |  | |  | |  |  |  | |  | |  |  | |  |  | |  |  | |  | |  | |  |  | |  |  | |  |  | |  |  |
|  | |  | | | | | | | | | | | |  | | |  | | CCL4 |  | |  |  | |  | |  |  |  | |  | |  |  | |  |  | |  |  | |  | |  | |  |  | |  |  | |  |  | |  |  |
|  | |  | | | | | | | | | | | |  | | |  | | CCL27 |  | |  |  | |  | |  |  |  | |  | |  |  | |  |  | |  |  | |  | |  | |  |  | |  |  | |  |  | |  |  |
|  | |  | | | | | | | | | | | |  | | |  | | TNFRSF13B |  | |  |  | |  | |  |  |  | |  | |  |  | |  |  | |  |  | |  | |  | |  |  | |  |  | |  |  | |  |  |
|  | |  | | | | | | | | | | | |  | | |  | | TNFAIP2 |  | |  |  | |  | |  |  |  | |  | |  |  | |  |  | |  |  | |  | |  | |  |  | |  |  | |  |  | |  |  |
|  | |  | | | | | | | | | | | |  | | |  | | IL31 |  | |  |  | |  | |  |  |  | |  | |  |  | |  |  | |  |  | |  | |  | |  |  | |  |  | |  |  | |  |  |
|  | |  | | | | | | | | | | | |  | | |  | | IL17A |  | |  |  | |  | |  |  |  | |  | |  |  | |  |  | |  |  | |  | |  | |  |  | |  |  | |  |  | |  |  |
|  | |  | | | | | | | | | | | |  | | |  | | TNFSF15 |  | |  |  | |  | |  |  |  | |  | |  |  | |  |  | |  |  | |  | |  | |  |  | |  |  | |  |  | |  |  |
|  | |  | | | | | | | | | | | |  | | |  | | CCL19 |  | |  |  | |  | |  |  |  | |  | |  |  | |  |  | |  |  | |  | |  | |  |  | |  |  | |  |  | |  |  |
|  | |  | | | | | | | | | | | |  | | |  | | IFNA6 |  | |  |  | |  | |  |  |  | |  | |  |  | |  |  | |  |  | |  | |  | |  |  | |  |  | |  |  | |  |  |
|  | |  | | | | | | | | | | | |  | | |  | | IL9 |  | |  |  | |  | |  |  |  | |  | |  |  | |  |  | |  |  | |  | |  | |  |  | |  |  | |  |  | |  |  |
|  | |  | | | | | | | | | | | |  | | |  | |  |  | |  |  | |  | |  |  |  | |  | |  |  | |  |  | |  |  | |  | |  | |  |  | |  |  | |  |  | |  |  |
|  | | Supplementary Table 4. The GO (Biological Process) analysis of differentially expressed genes between high- and low-immune groups   | **ID** | **Description** | **GeneRatio** | **p-Value** | **p-adjust** | **q-value** | **Count** | | --- | --- | --- | --- | --- | --- | --- | | GO:0006959 | humoral immune response | 51/257 | 4.36E-37 | 1.33E-33 | 1.12E-33 | 51 | | GO:0002460 | adaptive immune response based on somatic  recombination of immune receptors built from  immunoglobulin superfamily domains | 50/257 | 1.27E-35 | 1.94E-32 | 1.65E-32 | 50 | | GO:0006958 | complement activation, classical pathway | 35/257 | 1.01E-34 | 9.57E-32 | 8.10E-32 | 35 | | GO:0002455 | humoral immune response mediated by circulating immunoglobulin | 36/257 | 1.25E-34 | 9.57E-32 | 8.10E-32 | 36 | | GO:0006956 | complement activation | 37/257 | 2.21E-33 | 1.35E-30 | 1.14E-30 | 37 | | GO:0019724 | B cell mediated immunity | 40/257 | 3.21E-33 | 1.63E-30 | 1.38E-30 | 40 | | GO:0016064 | immunoglobulin mediated immune response | 39/257 | 3.41E-32 | 1.49E-29 | 1.26E-29 | 39 | | GO:0002449 | lymphocyte mediated immunity | 46/257 | 1.31E-31 | 5.00E-29 | 4.23E-29 | 46 | | GO:0072376 | protein activation cascade | 37/257 | 2.72E-31 | 9.22E-29 | 7.80E-29 | 37 | | GO:0002429 | immune response-activating cell surface receptor signaling pathway | 51/257 | 6.15E-31 | 1.88E-28 | 1.59E-28 | 51 | | GO:0002696 | positive regulation of leukocyte activation | 45/257 | 4.80E-29 | 1.33E-26 | 1.13E-26 | 45 | | GO:0050867 | positive regulation of cell activation | 45/257 | 2.31E-28 | 5.87E-26 | 4.96E-26 | 45 | | GO:0051249 | regulation of lymphocyte activation | 48/257 | 2.04E-27 | 4.78E-25 | 4.05E-25 | 48 | | GO:0050853 | B cell receptor signaling pathway | 29/257 | 3.84E-27 | 8.36E-25 | 7.08E-25 | 29 | | GO:0051251 | positive regulation of lymphocyte activation | 41/257 | 4.20E-27 | 8.55E-25 | 7.23E-25 | 41 | | GO:0006909 | phagocytosis | 42/257 | 2.00E-26 | 3.81E-24 | 3.22E-24 | 42 | | GO:0006910 | phagocytosis, recognition | 24/257 | 2.23E-25 | 4.01E-23 | 3.39E-23 | 24 | | GO:0006911 | phagocytosis, engulfment | 26/257 | 3.45E-24 | 5.85E-22 | 4.95E-22 | 26 | | GO:0050851 | antigen receptor-mediated signaling pathway | 37/257 | 9.02E-24 | 1.45E-21 | 1.23E-21 | 37 | | GO:0099024 | plasma membrane invagination | 26/257 | 2.63E-23 | 4.01E-21 | 3.39E-21 | 26 | | GO:0050871 | positive regulation of B cell activation | 27/257 | 2.95E-23 | 4.28E-21 | 3.62E-21 | 27 | | GO:0050900 | leukocyte migration | 44/257 | 4.26E-23 | 5.90E-21 | 5.00E-21 | 44 | | GO:0010324 | membrane invagination | 26/257 | 1.39E-22 | 1.84E-20 | 1.56E-20 | 26 | | GO:0050864 | regulation of B cell activation | 28/257 | 2.58E-21 | 3.28E-19 | 2.78E-19 | 28 | | GO:0042113 | B cell activation | 33/257 | 5.62E-20 | 6.85E-18 | 5.80E-18 | 33 | | GO:0008037 | cell recognition | 28/257 | 1.93E-19 | 2.26E-17 | 1.92E-17 | 28 | | GO:0002697 | regulation of immune effector process | 38/257 | 4.25E-19 | 4.80E-17 | 4.06E-17 | 38 | | GO:0030449 | regulation of complement activation | 21/257 | 6.02E-18 | 6.56E-16 | 5.55E-16 | 21 | | GO:2000257 | regulation of protein activation cascade | 21/257 | 7.26E-18 | 7.64E-16 | 6.46E-16 | 21 | | GO:0002920 | regulation of humoral immune response | 22/257 | 1.05E-17 | 1.06E-15 | 9.00E-16 | 22 |   GO, gene oncology.  Supplementary Table 5. The GO (Cellular Component) analysis of differentially expressed genes between high- and low-immune groups   | **ID** | **Description** | **GeneRatio** | **p-value** | **p-adjust** | **q-value** | **Count** | | --- | --- | --- | --- | --- | --- | --- | | GO:0019814 | immunoglobulin complex | 46/264 | 7.72E-49 | 2.12E-46 | 1.93E-46 | 46 | | GO:0042571 | immunoglobulin complex, circulating | 24/264 | 1.72E-27 | 2.36E-25 | 2.14E-25 | 24 | | GO:0009897 | external side of plasma membrane | 41/264 | 9.65E-25 | 8.85E-23 | 8.02E-23 | 41 | | GO:0062023 | collagen-containing extracellular matrix | 29/264 | 2.16E-13 | 1.49E-11 | 1.35E-11 | 29 | | GO:0042101 | T cell receptor complex | 17/264 | 1.22E-12 | 6.72E-11 | 6.10E-11 | 17 | | GO:0072562 | blood microparticle | 14/264 | 1.15E-08 | 5.28E-07 | 4.79E-07 | 14 | | GO:0098802 | plasma membrane receptor complex | 19/264 | 1.91E-08 | 7.50E-07 | 6.80E-07 | 19 | | GO:0005581 | collagen trimer | 10/264 | 2.53E-07 | 8.69E-06 | 7.88E-06 | 10 | | GO:0044420 | extracellular matrix component | 6/264 | 5.92E-05 | 0.0018077 | 0.00163991 | 6 | | GO:0001772 | immunological synapse | 5/264 | 0.00011123 | 0.00305884 | 0.00277491 | 5 | | GO:0005604 | basement membrane | 7/264 | 0.00028885 | 0.00722135 | 0.00655104 | 7 | | GO:0098644 | complex of collagen trimers | 3/264 | 0.00196209 | 0.04465292 | 0.04050811 | 3 | | GO:0031225 | anchored component of membrane | 8/264 | 0.00211087 | 0.04465292 | 0.04050811 | 8 | | GO:0030665 | clathrin-coated vesicle membrane | 6/264 | 0.00454374 | 0.0892521 | 0.08096745 | 6 | | GO:0019897 | extrinsic component of plasma membrane | 7/264 | 0.00691103 | 0.12670215 | 0.11494128 | 7 | | GO:0005583 | fibrillar collagen trimer | 2/264 | 0.00907049 | 0.14672859 | 0.1331088 | 2 | | GO:0098643 | banded collagen fibril | 2/264 | 0.00907049 | 0.14672859 | 0.1331088 | 2 | | GO:0034774 | secretory granule lumen | 10/264 | 0.01159148 | 0.17709205 | 0.16065384 | 10 | | GO:0060205 | cytoplasmic vesicle lumen | 10/264 | 0.01610116 | 0.2255268 | 0.20459273 | 10 | | GO:0031983 | vesicle lumen | 10/264 | 0.01640195 | 0.2255268 | 0.20459273 | 10 | | GO:0030669 | clathrin-coated endocytic vesicle membrane | 3/264 | 0.02099198 | 0.27331119 | 0.24794164 | 3 | | GO:0070820 | tertiary granule | 6/264 | 0.02328361 | 0.27331119 | 0.24794164 | 6 | | GO:0099092 | postsynaptic density, intracellular component | 2/264 | 0.02372805 | 0.27331119 | 0.24794164 | 2 | | GO:0005788 | endoplasmic reticulum lumen | 9/264 | 0.02385261 | 0.27331119 | 0.24794164 | 9 | | GO:0045121 | membrane raft | 9/264 | 0.02656154 | 0.28592949 | 0.25938867 | 9 | | GO:0098857 | membrane microdomain | 9/264 | 0.02703333 | 0.28592949 | 0.25938867 | 9 | | GO:0099091 | postsynaptic specialization, intracellular component | 2/264 | 0.03172579 | 0.31301797 | 0.28396271 | 2 | | GO:0098589 | membrane region | 9/264 | 0.0331638 | 0.31301797 | 0.28396271 | 9 | | GO:0031091 | platelet alpha granule | 4/264 | 0.03395886 | 0.31301797 | 0.28396271 | 4 | | GO:0031258 | lamellipodium membrane | 2/264 | 0.03459564 | 0.31301797 | 0.28396271 | 2 |   GO, gene oncology.  Supplementary Table 6. The GO (Molecular Function) analysis of differentially expressed genes between high- and low-immune groups   | **ID** | **Description** | **GeneRatio** | **p-value** | **p-adjust** | **q-value** | **Count** | | --- | --- | --- | --- | --- | --- | --- | | GO:0003823 | antigen binding | 37/230 | 5.96E-36 | 2.34E-33 | 2.03E-33 | 37 | | GO:0034987 | immunoglobulin receptor binding | 24/230 | 3.32E-27 | 6.50E-25 | 5.64E-25 | 24 | | GO:0005201 | extracellular matrix structural constituent | 24/230 | 1.11E-18 | 1.45E-16 | 1.25E-16 | 24 | | GO:0005125 | cytokine activity | 15/230 | 1.97E-07 | 1.93E-05 | 1.67E-05 | 15 | | GO:0005539 | glycosaminoglycan binding | 15/230 | 3.30E-07 | 2.59E-05 | 2.25E-05 | 15 | | GO:0005126 | cytokine receptor binding | 16/230 | 1.10E-06 | 7.21E-05 | 6.26E-05 | 16 | | GO:0001965 | G-protein alpha-subunit binding | 5/230 | 1.23E-05 | 0.00067999 | 0.00058978 | 5 | | GO:0030020 | extracellular matrix structural constituent conferring tensile strength | 6/230 | 1.39E-05 | 0.00067999 | 0.00058978 | 6 | | GO:0008009 | chemokine activity | 6/230 | 3.96E-05 | 0.00172375 | 0.00149509 | 6 | | GO:0048018 | receptor ligand activity | 18/230 | 6.24E-05 | 0.00244423 | 0.00212 | 18 | | GO:0042379 | chemokine receptor binding | 6/230 | 0.00021399 | 0.00759571 | 0.00658811 | 6 | | GO:0005518 | collagen binding | 6/230 | 0.00023252 | 0.00759571 | 0.00658811 | 6 | | GO:0048407 | platelet-derived growth factor binding | 3/230 | 0.00033101 | 0.00998112 | 0.00865709 | 3 | | GO:0008201 | heparin binding | 9/230 | 0.00037377 | 0.01046565 | 0.00907735 | 9 | | GO:0019838 | growth factor binding | 8/230 | 0.00042791 | 0.01089597 | 0.00945059 | 8 | | GO:1901681 | sulfur compound binding | 11/230 | 0.00044473 | 0.01089597 | 0.00945059 | 11 | | GO:0005164 | tumor necrosis factor receptor binding | 4/230 | 0.00066386 | 0.01530783 | 0.0132772 | 4 | | GO:0042834 | peptidoglycan binding | 3/230 | 0.00128774 | 0.02804422 | 0.02432407 | 3 | | GO:0004866 | endopeptidase inhibitor activity | 8/230 | 0.00208835 | 0.04308598 | 0.03737049 | 8 | | GO:0004222 | metalloendopeptidase activity | 6/230 | 0.00226326 | 0.04435993 | 0.03847545 | 6 | | GO:0005540 | hyaluronic acid binding | 3/230 | 0.00242403 | 0.04524848 | 0.03924613 | 3 | | GO:0030414 | peptidase inhibitor activity | 8/230 | 0.00266319 | 0.04539 | 0.03936888 | 8 | | GO:0061135 | endopeptidase regulator activity | 8/230 | 0.00266319 | 0.04539 | 0.03936888 | 8 | | GO:0030021 | extracellular matrix structural constituent conferring compression resistance | 3/230 | 0.00278006 | 0.04540764 | 0.03938418 | 3 | | GO:0032813 | tumor necrosis factor receptor superfamily binding | 4/230 | 0.00295757 | 0.04637465 | 0.04022291 | 4 | | GO:0001664 | G protein-coupled receptor binding | 10/230 | 0.00373278 | 0.05627883 | 0.04881327 | 10 | | GO:0043027 | cysteine-type endopeptidase inhibitor activity involved in apoptotic process | 3/230 | 0.00403479 | 0.05857912 | 0.05080842 | 3 | | GO:0005044 | scavenger receptor activity | 4/230 | 0.00430643 | 0.06029003 | 0.05229238 | 4 | | GO:0050839 | cell adhesion molecule binding | 14/230 | 0.00584353 | 0.07898838 | 0.06851033 | 14 | | GO:0002020 | protease binding | 6/230 | 0.00657626 | 0.0859298 | 0.07453095 | 6 |   GO, Gene Oncology.  Supplementary Table 7. The KEGG analysis of differentially expressed genes between high- and low-immune groups   | **ID** | **Description** | **GeneRatio** | **p-value** | **p-adjust** | **q-value** | **Count** | | --- | --- | --- | --- | --- | --- | --- | | hsa04060 | Cytokine-cytokine receptor interaction | 23/104 | 1.87E-12 | 3.75E-10 | 3.30E-10 | 23 | | hsa04061 | Viral protein interaction with cytokine and cytokine receptor | 11/104 | 5.49E-08 | 5.52E-06 | 4.86E-06 | 11 | | hsa05340 | Primary immunodeficiency | 7/104 | 4.54E-07 | 3.04E-05 | 2.68E-05 | 7 | | hsa04668 | TNF signaling pathway | 9/104 | 1.32E-05 | 0.0006626 | 0.00058296 | 9 | | hsa04640 | Hematopoietic cell lineage | 8/104 | 3.92E-05 | 0.00157412 | 0.00138492 | 8 | | hsa04659 | Th17 cell differentiation | 8/104 | 6.85E-05 | 0.0022933 | 0.00201767 | 8 | | hsa04062 | Chemokine signaling pathway | 10/104 | 0.00015809 | 0.00424828 | 0.00373769 | 10 | | hsa04658 | Th1 and Th2 cell differentiation | 7/104 | 0.00017777 | 0.00424828 | 0.00373769 | 7 | | hsa05323 | Rheumatoid arthritis | 7/104 | 0.00019022 | 0.00424828 | 0.00373769 | 7 | | hsa04064 | NF-kappa B signaling pathway | 7/104 | 0.00037975 | 0.00734539 | 0.00646256 | 7 | | hsa04672 | Intestinal immune network for IgA production | 5/104 | 0.00040199 | 0.00734539 | 0.00646256 | 5 | | hsa05144 | Malaria | 5/104 | 0.0004421 | 0.00740518 | 0.00651516 | 5 | | hsa05145 | Toxoplasmosis | 7/104 | 0.00059519 | 0.00920259 | 0.00809655 | 7 | | hsa04151 | PI3K-Akt signaling pathway | 12/104 | 0.00199693 | 0.02867027 | 0.02522443 | 12 | | hsa04621 | NOD-like receptor signaling pathway | 8/104 | 0.00233514 | 0.03129084 | 0.02753004 | 8 | | hsa04657 | IL-17 signaling pathway | 5/104 | 0.00731599 | 0.08440346 | 0.07425913 | 5 | | hsa05166 | Human T-cell leukemia virus 1 infection | 8/104 | 0.00737395 | 0.08440346 | 0.07425913 | 8 | | hsa04974 | Protein digestion and absorption | 5/104 | 0.00764461 | 0.08440346 | 0.07425913 | 5 | | hsa04215 | Apoptosis - multiple species | 3/104 | 0.00797844 | 0.08440346 | 0.07425913 | 3 | | hsa00590 | Arachidonic acid metabolism | 4/104 | 0.0088237 | 0.08867817 | 0.07802007 | 4 | | hsa04660 | T cell receptor signaling pathway | 5/104 | 0.01107768 | 0.10602926 | 0.09328576 | 5 | | hsa05219 | Bladder cancer | 3/104 | 0.01576922 | 0.1440733 | 0.12675734 | 3 | | hsa04630 | JAK-STAT signaling pathway | 6/104 | 0.01843439 | 0.16110051 | 0.14173808 | 6 | | hsa04926 | Relaxin signaling pathway | 5/104 | 0.02577836 | 0.21589378 | 0.18994582 | 5 | | hsa05150 | Staphylococcus aureus infection | 4/104 | 0.03567063 | 0.2791912 | 0.24563562 | 4 | | hsa05215 | Prostate cancer | 4/104 | 0.03684646 | 0.2791912 | 0.24563562 | 4 | | hsa04933 | AGE-RAGE signaling pathway in diabetic complications | 4/104 | 0.04050739 | 0.2791912 | 0.24563562 | 4 | | hsa05416 | Viral myocarditis | 3/104 | 0.0424803 | 0.2791912 | 0.24563562 | 3 | | hsa04514 | Cell adhesion molecules (CAMs) | 5/104 | 0.04280878 | 0.2791912 | 0.24563562 | 5 | | hsa05142 | Chagas disease (American trypanosomiasis) | 4/104 | 0.04305934 | 0.2791912 | 0.24563562 | 4 |   KEGG, Kyoto Encyclopedia of Genes and Genomes  Supplementary Table 8. Overlapping genes of hypoxia related DEGs and immune related DEGs   | **Overlapping Genes** | | --- | | ABHD1 | | ABR | | AC002064.3 | | AC004862.1 | | AC007406.2 | | AC013244.1 | | AC019129.1 | | AC040173.1 | | AC046185.3 | | AC069294.1 | | AC098613.1 | | AC131097.2 | | AC135586.2 | | ADAMDEC1 | | ADAMTS15 | | ADAMTS5 | | ADORA2BP1 | | ADRA2A | | AEBP1 | | AL161935.3 | | AL356490.1 | | AL451069.1 | | AL590483.2 | | AL590764.1 | | ALOX5 | | ALOX5AP | | ANK2 | | ANKFN1 | | ANTXR1 | | APOBEC3C | | AREG | | ARL4C | | ASB2 | | ATP2A3 | | B3GALT2 | | BIRC3 | | BIRC7 | | C1QTNF3 | | C3orf85 | | C7 | | CA14 | | CAPG | | CCL13 | | CCL2 | | CCL22 | | CCNJL | | CCR5 | | CD177 | | CD1E | | CD207 | | CD27 | | CD38 | | CD3D | | CD3E | | CD40LG | | CD48 | | CD5 | | CD52 | | CD6 | | CD70 | | CD79A | | CDCA8 | | CDH11 | | CDH17 | | CEACAM6 | | CELF2 | | CFAP57 | | CFD | | CFTR | | CHI3L2 | | CIDEB | | CLIC6 | | CLIP3 | | CLMP | | COL14A1 | | COL16A1 | | COL1A1 | | COL5A1 | | COL7A1 | | COL8A2 | | COX7A1 | | CREB3L1 | | CRLF2 | | CSF2RA | | CTNNA2 | | CXCL17 | | CXCL5 | | CXCL6 | | CXCL8 | | CXCR6 | | CYS1 | | DEF6 | | DIO3 | | DPT | | DRD1 | | DUOXA2 | | DUSP4 | | ECM1 | | EID3 | | EIPR1-IT1 | | EMILIN2 | | EPO | | FA2H | | FABP3 | | FAP | | FCGR2A | | FCN3 | | FPR1 | | FXYD5 | | FZD2 | | GAL3ST4 | | GALNT3 | | GATA3 | | GBP5 | | GCNT1 | | GGT5 | | GNG8 | | GPBAR1 | | GPNMB | | GPR132 | | GPR183 | | GPR68 | | GPR84 | | GPRC5A | | GSTP1 | | HAPLN3 | | HAS1 | | HAVCR1 | | HAVCR2 | | HCG14 | | HLA-DQA1 | | HOXB-AS1 | | HPSE | | HSD11B1 | | HTRA3 | | ICOS | | IGFBP6 | | IGHD | | IGHG2 | | IGHGP | | IGHM | | IGHV1-24 | | IGHV1-45 | | IGHV1-69 | | IGHV2-26 | | IGHV2-5 | | IGHV2-70 | | IGHV2-70D | | IGHV3-13 | | IGHV3-20 | | IGHV3-23 | | IGHV3-35 | | IGHV3-43 | | IGHV3-64 | | IGHV3-7 | | IGHV3-72 | | IGHV3-74 | | IGHV4-4 | | IGHV4-55 | | IGHV5-78 | | IGKV1-12 | | IGKV1-27 | | IGKV1-5 | | IGKV1-6 | | IGKV1-9 | | IGKV1D-42 | | IGKV2-30 | | IGKV2D-24 | | IGKV2D-40 | | IGKV3-11 | | IGKV3D-11 | | IGKV3D-20 | | IGKV3OR2-268 | | IGKV5-2 | | IGKV6D-21 | | IGLC2 | | IGLC7 | | IGLV1-44 | | IGLV2-14 | | IGLV3-10 | | IGLV3-12 | | IGLV3-21 | | IGLV3-25 | | IGLV3-9 | | IGLV4-69 | | IGLV6-57 | | IGLV7-46 | | IGLV8-61 | | IKZF1 | | IL18 | | IL2RA | | IL34 | | IRF4 | | ISLR | | ITGB2-AS1 | | JAK3 | | JCHAIN | | KCNN4 | | KEL | | KLHL6 | | KPNA2 | | KRT6B | | LAMC2 | | LCK | | LGI2 | | LIF | | LIMD2 | | LINC01480 | | LINC01857 | | LINC01943 | | LINC02446 | | LOXL1 | | LPAR1 | | LTA | | LTF | | MAGEB17 | | MARCO | | MBOAT4 | | MEOX1 | | MEX3A | | MFAP4 | | MGP | | MICAL1 | | MMP2 | | MMP9 | | MRC2 | | MUC6 | | MXRA5 | | NFE4 | | NGFR | | NTRK2 | | OGN | | OLFM4 | | OMG | | PAGE4 | | PARM1 | | PCED1B-AS1 | | PDGFRA | | PDSS1 | | PI3 | | PIGZ | | PLA2G4A | | PLAC8 | | PLOD2 | | PMP22 | | PODN | | POSTN | | POU2AF1 | | PRND | | PROM1 | | PSRC1 | | PSTPIP1 | | PTGS1 | | PTPN22 | | RAB33A | | RAB42 | | RCAN2 | | RGS1 | | RGS2 | | RGS4 | | RHOH | | RIPK3 | | RRAD | | RUBCNL | | S100A4 | | SCARA5 | | SEMA4A | | SGCA | | SH2D1A | | SLAMF8 | | SLC1A7 | | SLC5A1 | | SLC6A6 | | SMIM25 | | SOD3 | | SORD2P | | SP140 | | SPON1 | | SRPX | | STAP1 | | SUSD5 | | SYTL1 | | TAGAP | | TECTB | | TESPA1 | | TFPI2 | | THBS2 | | TIMP1 | | TLR8 | | TMEM119 | | TMEM130 | | TMEM158 | | TMEM45A | | TNFRSF17 | | TNFRSF18 | | TNFSF13B | | TRAC | | TRAV21 | | TRAV8-3 | | TRAV8-6 | | TRAV9-2 | | TRBC1 | | TRBC2 | | TRBJ2-1 | | TRBV19 | | TRBV2 | | TRBV28 | | TRBV30 | | TRBV5-1 | | TRBV5-6 | | TRBV9 | | TREM2 | | TRGV10 | | U62317.4 | | UBASH3A | | UGT1A4 | | VCAN | | VNN2 | | WISP2 | | ZNF683 |   DEGs, differentially expressed genes. | | | | | | | | | | | |  | | |  | |  |  | |  |  | |  | |  |  |  | |  | |  |  | |  |  | |  |  | |  | |  | |  |  | |  |  | |  |  | |  |  |
